# Supplementary material
Source: PubMed Central journal article supplement (PMC6554529)

# Adoptive Transfer of NKG2D CAR mRNA-Engineered Natural Killer Cells in Colorectal Cancer Patients

Lin Xiao,<sup>1,12</sup> Dongzhi Cen,<sup>2,12</sup> Haining Gan,<sup>1</sup> Yan Sun,<sup>3</sup> Nanqi Huang,<sup>1</sup> Hanzhen Xiong,<sup>4</sup> Qiongmei Jin,<sup>2</sup> Liquan Su,<sup>2</sup> Xuejuan Liu,<sup>1</sup> Kejian Wang,<sup>5</sup> Guangrong Yan,<sup>6</sup> Tianfa Dong,<sup>7</sup> Shangbiao Wu,<sup>1</sup> Pengzhi Zhou,<sup>3</sup> Jinshan Zhang,<sup>2</sup> Weixiang Liang,<sup>8</sup> Junlan Ren,<sup>9</sup> Yaoshu Teng,<sup>10</sup> Can Chen,<sup>11</sup> and Xue Hu Xu<sup>1</sup>

<sup>1</sup>Department of Gastrointestinal Surgery, The Third Affiliated Hospital of Guangzhou Medical University, Guangzhou, Guangdong 510150, China; <sup>2</sup>Department of Radiation Oncology and Nuclear Medicine, The Third Affiliated Hospital of Guangzhou Medical University, Guangzhou, Guangdong 510150, China; <sup>3</sup>Department of Gastroenterology, The Third Affiliated Hospital of Guangzhou Medical University, Guangzhou, Guangdong 510150, China; <sup>4</sup>Department of Pathology, The Third Affiliated Hospital of Guangzhou Medical University, Guangzhou, Guangdong 510150, China; <sup>5</sup>Lin He's Academician Workstation of New Medicine and Clinical Translation at The Third Affiliated Hospital, Guangzhou Medical University, Guangzhou 510150, China; <sup>6</sup>Biomedicine Research Centre, The Third Affiliated Hospital of Guangzhou Medical University, Guangzhou, Guangdong 510150, China; <sup>7</sup>Department of Radiology, The Third Affiliated Hospital of Guangzhou Medical University, Guangzhou, Guangdong 510150, China; <sup>8</sup>Department of Ultrasound, The Third Affiliated Hospital of Guangzhou Medical University, Guangzhou, Guangdong 510150, China; <sup>9</sup>Guangzhou Regenerative Medicine and Health-Guangdong Laboratory (GRMH-GDL), Guangzhou, Guangdong Province 510320, China; <sup>10</sup>Department of Otorhinolaryngology, Affiliated Hangzhou First's People Hospital, Zhejiang University School of Medicine, Hangzhou 310006, China; <sup>11</sup>Hangzhou Youshan Biomedical Co., Ltd., 459 Qianmo Road, Hangzhou 310051, China

**By fusing the extracellular domain of the natural killer (NK) cell receptor NKG2D to DAP12, we constructed a chimeric antigen receptor (CAR) to improve NK cell tumor responses. An RNA electroporation approach that provides transient expression of the CAR was adopted as a risk mitigation strategy. Expression of the NKG2D RNA CAR significantly augmented the cytolytic activity of NK cells against several solid tumor cell lines *in vitro* and provided a clear therapeutic benefit to mice with established solid tumors. Three patients with metastatic colorectal cancer were then treated with local infusion of the CAR-NK cells. Reduction of ascites generation and a marked decrease in number of tumor cells in ascites samples were observed in the first two patients treated with intraperitoneal infusion of low doses of the CAR-NK cells. The third patient with metastatic tumor sites in the liver was treated with ultrasound-guided percutaneous injection, followed by intraperitoneal infusion of the CAR-NK cells. Rapid tumor regression in the liver region was observed with Doppler ultrasound imaging and complete metabolic response in the treated liver lesions was confirmed by positron emission tomography (PET)- computed tomographic (CT) scanning. Our results highlight a promising therapeutic potential of using RNA CAR-modified NK cells to treat metastatic colorectal cancer.**

## INTRODUCTION

Natural killer (NK) cells are innate lymphocytes that recognize and lyse transformed cells and virally infected cells without prior activation. Adoptive cancer therapy with NK cells is increasingly being tested in clinical trials due to the capability of NK cells in inducing immune responses against malignancies in an antigen-independent and non-

major histocompatibility complex (MHC) restricted manner.<sup>1</sup> The use of NK cells for cancer immunotherapy was given a new lease of life when allogeneic NK cells were found to treat leukemia patients effectively. Importantly, transplantation from NK cell alloreactive donors has produced beneficial graft-versus-leukemia outcome and protected patients against graft rejection and detrimental graft-versus-host disease (GVHD).<sup>2</sup> The favorable therapeutic and safety profile of allogeneic NK cell therapy is considered as an important practical advantage over adoptive therapy of autologous T cells.<sup>3,4</sup> Clinically, the use of allogeneic NK cells from healthy donors offers the attractive potential to overcome cancer-treatment-caused immune defects associated with the use of patient immune cells. Significant efforts are currently undertaken to fully exploit the anti-tumor effect of NK cells in the clinic, but failures to achieve primary clinical end points, especially during the treatment of solid tumors, are still common.<sup>1,5-8</sup>

The cytotoxicity potential of NK cells against cancer is regulated by a panel of endogenous activating and inhibitory receptors.<sup>9</sup> Among the activation receptors is the natural killer group 2 member D (NKG2D) receptor. The NKG2D receptor, expressed by human NK cells, CD8<sup>+</sup> T cells,  $\gamma\delta$  T cells, and NKT cells, can interact with eight NKG2D ligands (NKG2DLs) belonging to two families: two MHC class I

Received 19 November 2018; accepted 11 March 2019;  
<https://doi.org/10.1016/j.ymthe.2019.03.011>.

<sup>12</sup>These authors contributed equally to this work.

**Correspondence:** Xue Hu Xu, Department of Gastrointestinal Surgery, The Third Affiliated Hospital of Guangzhou Medical University, Guangzhou, Guangdong 510150, China.

**E-mail:** [xxh@gzhmu.edu.cn](mailto:xxh@gzhmu.edu.cn)

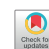

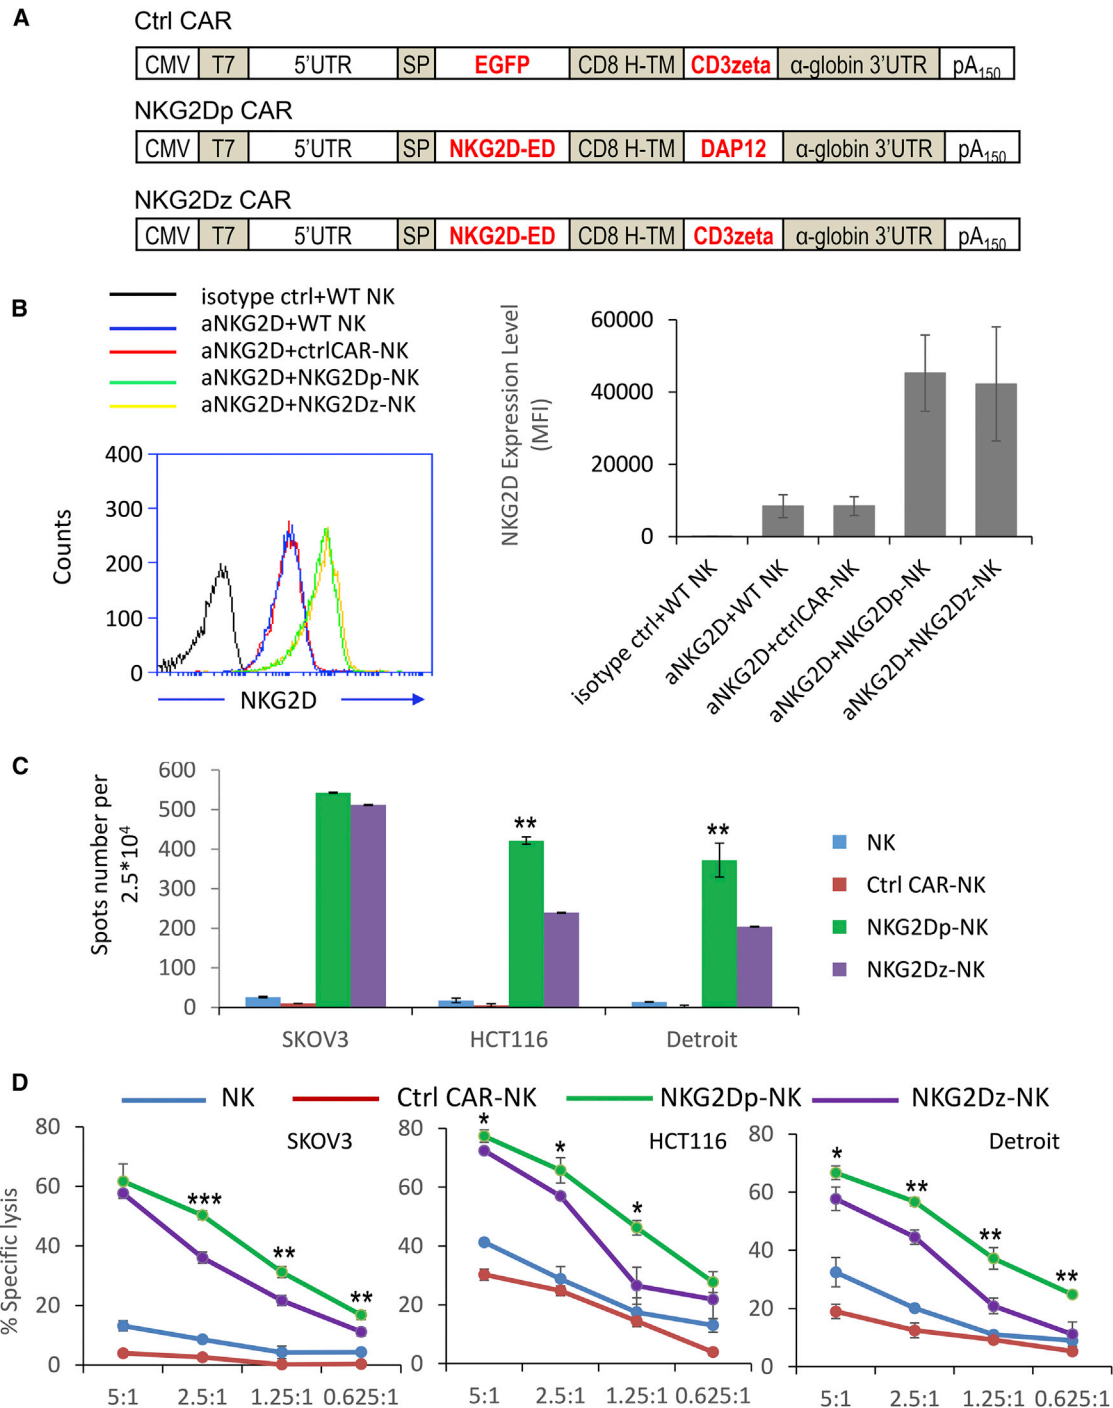

**Figure 1. Construction, Expression, and Effects of NKG2D Ligand-Specific CARs**

(A) Schematic diagrams of mRNA CAR constructs used in this study, including the control vector mGFP CAR, the first-generation CAR NKG2D-DAP12 (NKG2Dp), and the first-generation CAR NKG2D-CD3 $\zeta$  (NKG2Dz). The DNA templates of the CARs were PCR amplified using a CMV forward primer and reverse primer with 150 Ts. The PCR amplicons were then used for RNA transcription to generate mRNA CARs for NK cell electroporation. (B) Flow cytometric analysis with an anti-NKG2D antibody to detect the surface expression of NKG2D CARs on NK cells. The analysis was performed 24 h after mRNA electroporation. Mean fluorescence intensities (MFIs) are shown on the right ( $n = 3$ ). (C) IFN $\gamma$  secretion as determined by an IFN $\gamma$  ELISPOT assay. Human SKOV3 ovarian cancer cell line, HCT116 colon cancer cell line, and Detroit562 pharyngeal carcinoma cell lines were used. NK cells were electroporated with various NKG2D RNA CARs and co-cultured with target tumor cells at an E:T ratio of 5:1 overnight before

(legend continued on next page)

chain-related proteins MICA and MICB and six human cytomegalovirus (HCMV) UL16-binding proteins (ULBP1–6). NKG2DLs are not usually expressed on healthy tissues<sup>10–14</sup> but can be upregulated upon DNA damage, infection, and transformation of cells, thus being commonly detected on carcinomas.<sup>15–18</sup> Because of their tumor-associated overexpression, NKG2DLs have been a favorable therapeutic target for anticancer strategies.<sup>15–18</sup>

To improve the efficacy of adoptive NK cell therapy, chimeric antigen receptors (CARs) have been developed to modify the immune effector cells by gene transfer.<sup>1,19–22</sup> CARs can redirect the specificity of immune cells to cancer cell surface antigens, including NKG2DLs.<sup>23–34</sup> We hypothesized that after introducing a CAR specific to NKG2DLs into NK cells, the binding of the CAR to the ligands expressed on cancer cells could activate the NK cells directly, thus significantly enhancing the antitumor immunity of the cells. To test the hypothesis, we have constructed a CAR that use the extracellular domain (ED) of the human NKG2D receptor fused with the cytoplasmic domain of DAP12, an adaptor molecule associated with activating NK cell receptors and crucial in signal transduction of activated NK cells.<sup>35,36</sup> In order to address the concern of on-target and off-tumor toxicity of an NKG2D CAR against non-tumor tissues,<sup>37–39</sup> we adopted an RNA CAR approach to transiently enhance the specificity of NK cells toward NKG2DLs and their tumor-cell-killing activity. We further hypothesized that the local treatment of intraperitoneal tumors with the CAR-NK cells would be a safe and effective way. The present study aims to test the hypotheses.

## RESULTS

### NK Cells Expressing NKG2D CAR with DAP12 Resulted in Strong Cytotoxic Immune Responses *In Vitro*

We designed two NKG2D RNA CARs consisting of the ED of NKG2D, the CD8 $\alpha$  hinge and transmembrane region, and the intracellular signaling domain CD3zeta (NKG2Dz) or DAP12 (NKG2Dp) (Figure 1A) and compared the expression and activity of the two constructs in NK cells *in vitro*. We adopted an mRNA electroporation approach to facilitate fast evaluation of the two constructs. RNA electroporation was optimized in NK cells using EGFP mRNA, which provided almost 99% transfection efficiency (Figure S2). While the electroporation of NK cells with the EGFP fused with CD3 zeta (mGFP), a control construct with EGFP to replace the ED of NKG2D, did not increase NKG2D expression, the increased NKG2D expression was observed after the electroporation of NK cells with NKG2Dz or NKG2Dp (Figure 1B). Time-lapse analysis of NKG2Dp CAR expression after electroporation demonstrated that RNA CAR expression maintained for at least 5 days (Figures S2 and S3).

To compare cytotoxic immune responses induced by NK cells electroporated with NKG2Dz and NKG2Dp mRNA CARs, NK cells expanded

from the same donors and under the same controlled conditions were electroporated with the same amount of mRNA CARs. We first performed interferon (IFN) $\gamma$  ELISPOT assays using human SKOV3, HCT116, and Detroit562 cancer cells as targets (Figure 1C). Analysis with a spot-counting machine indicated that there was stronger development of spots with CAR-equipped NK cells than with the control NK cells ( $p < 0.001$ ). Comparing the two different NKG2D RNA CAR-modified NK cells, the IFN $\gamma$  secretion levels of NKG2Dz CAR-equipped NK cells were relatively lower than those induced by NKG2Dp CAR-equipped NK cells. *In vitro* cytotoxicity assays using the Delfia cytotoxicity kit further confirmed that NKG2Dp CAR-modified NK cells were more effective in cancer cell killing as compared with NKG2Dz CAR-modified NK cells (Figure 1D). Based on these results, we selected NKG2Dp CAR-modified NK cells for downstream studies.

### Multiple Injections of CAR-NK Cells Delay Disease Progression in Tumor-Bearing Mice

To obtain a proof of concept of the *in vivo* tumor killing effect of the NKG2D RNA CAR-modified NK cells, we established a xenograft mouse model by intraperitoneal (i.p.) injection of  $1 \times 10^7$  human colorectal HCT116-Luc cancer cells into NSG mice. Seven days post-tumor-cell injection, the tumor-bearing mice were treated with i.p. injection of PBS, mock NK cells, or NK cells modified with NKG2Dp CAR ( $1 \times 10^7$  cells per injection) twice a week for 3 weeks. Tumor growth was monitored with non-invasive whole-body bioluminescent imaging (BLI) of HCT116-Luc cells from day 7 to day 42 (Figure 2A). BLI demonstrated that HCT116 tumors progressed aggressively in the two control groups treated with PBS and mock NK cells. In the group of mice treated with NKG2Dp CAR-modified NK cells, the tumor burdens were reduced relative to the initial tumor burdens during the 3-week treatment period but tumor regrowth was noticed after termination of the treatment. Mice in the two control groups were euthanized by day 37 and day 47, respectively, due to rapid disease progression (Figure 2B). In contrast, mice receiving NKG2Dp CAR-modified NK cells were significantly protected from rapid tumor progression and the median survival time of the mice was prolonged by 92% as compared to the PBS group and 53% as compared to the mock NK group ( $p < 0.0001$ ; Figure 2B).

### Characterization of CAR-NK Cells Generated with Blood Samples Collected from a Patient and Haploidentical Family Donors

We conducted a pilot clinical trial study in three patients with chemotherapy-refractory metastatic colorectal cancer to evaluate the safety and feasibility of adoptive cell therapy with NK cells modified by electroporation of mRNA encoding NKG2Dp CAR. The production and characterization of CAR-NK cells used for patient treatment,

---

assay. Mock NK cells and mGFP RNA CAR-transfected NK cells served as negative controls. Mean IFN $\gamma$  spots per  $2.5 \times 10^4$  cells  $\pm$  SD from triplicate cultures are shown. (D) Delfia EuTDA cytotoxicity assay (2 h EuTDA culturing) to assess tumor cell lysis efficiency. The cytotoxicity of CAR-NK cells against tumor cells were observed after NKG2D CAR mRNA electroporation, but not after mGFP mRNA electroporation. The results of one representative experiment out of three are shown. \* $p < 0.05$ , \*\* $p < 0.01$ , and \*\*\* $p < 0.001$ , between NKG2Dp-NK and NKG2Dz-NK.

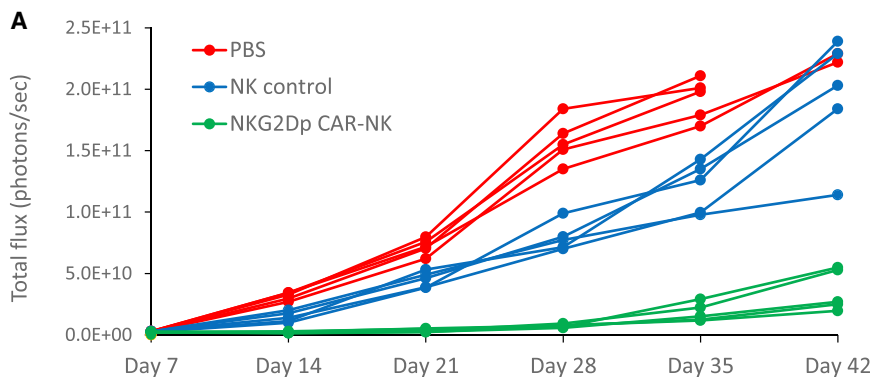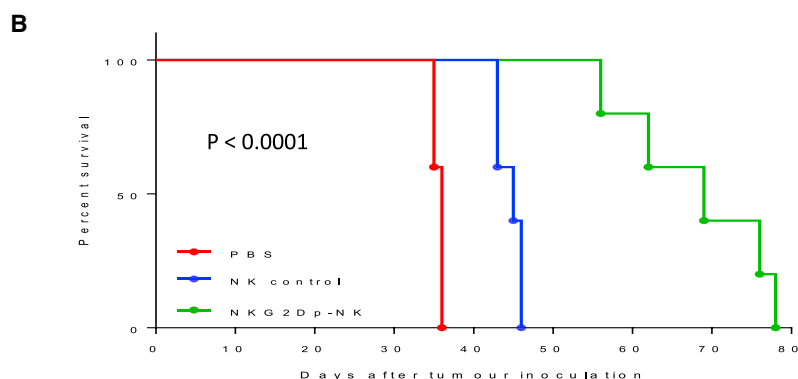

|           | Median Survival (days) |
|-----------|------------------------|
| PBS       | 36                     |
| NK        | 45                     |
| NKG2Dp-NK | 69                     |

including CAR-NK cell release criteria and the cell viability of the CAR-NK cells after electroporation are summarized in Table 1 and Figures S4 and S5. Autologous NK cells were prepared with 100 mL of blood from the first patient (1001), and allogeneic NK cells were prepared with 200 mL of blood from haploidentical family donors for the second and third patients (1002 and 1003). NK cell expansion was performed with K562 feeder cells expressing mbIL-15, 4-1BBL, and mbIL-21. Flow cytometry analysis was carried out before and after NK cell expansion and before and following transduction with NKG2Dp CAR construct. For the three patients, the mean percentage of CD56<sup>+</sup> CD3<sup>-</sup> cells increased from initial 11.7% to 35.1% to 96.9% ( $\pm 2.83\%$ ) after expansion and CD3<sup>+</sup> T cell depletion. Electroporation was used to transfect NKG2Dp CAR mRNA into NK cells. Successful transfection was demonstrated by increase of NKG2D median fluorescent intensity (MFI) (Table 1) and *in vitro* cytotoxicity assays that confirmed the robust lysis of NKG2D ligand-positive HCT116 human colorectal carcinoma cells by CAR-NK cells (Table 1). Cells in the final products were above 90% viable before infusion. The treat-

**Figure 2. Effects of NK Cells Electroporated with NKG2D CAR mRNA in Mouse Tumor Models**

NSG mice (n = 5 per group) were i.p. injected with the HCT116-Luc human cancer cells,  $1 \times 10^7$  cancer cells per mouse. CAR-NK cell treatment started 7 days after tumor cell inoculation, twice a week for 3 weeks,  $1 \times 10^7$  CAR-NK cells per injection. The mice were followed with serial weekly imaging to assess the tumor burden. (A) Effects of NK cells electroporated with NKG2Dp mRNA on tumor burden over time in mice with HCT116-Luc xenografts. Tumor burden over time by BLI is shown. Each mouse is represented by one line. (B) Kaplan-Meier analysis of survival in the HCT116-Luc tumor model. Statistical analysis of survival between groups was performed using the log-rank test. Median survival days are shown below.

ment scheme for the three patients is detailed in Table 1 and illustrated in Figure S6.

#### Adverse Events Experienced from CAR-NK Cell Therapy

We evaluated adverse events of any grade attributable to any cause in the three patients according to Common Terminology Criteria for Adverse Events (CTCAE) v4.0 (Table 2). No CAR-NK dose reduction was required and, therefore, all patients received scheduled doses. There were no dose-limiting toxicities. No serious adverse effects ( $\geq$  grade 3 adverse events) were noted in any of the three patients. Only grade 1 cytokine release syndrome was observed, and none of the patients experienced neurologic symptoms. The most common treatment-related adverse events reported included fever (Figures S7–S9), fatigue, and anorexia. Patient 1003 developed

fever after the second, fourth, fifth, and sixth infusions that peaked at 40.0°C (Figure S9), associated with increased plasma interleukin (IL)-6 levels peaked at 224 pg/mL and C-reactive protein (CRP) levels peaked at 117.6 mg/L (Figure S10). The fever resolved after ice-pack application. GVHD was not observed in the two patients treated with haploidentical NK cells.

#### Adoptive Transfer of CAR-NK Cells into the Patient's Peritoneal Cavity Shows a Clinical Benefit in Controlling Malignant Ascites

Two patients, 1001 and 1002, with substantial disease burdens and malignant ascites (Table 3) received multiple rounds of intraperitoneal NK cell infusions in a dose-escalation manner (Table 1; Figure S6). Patient 1001 received two infusions of CAR-NK cells ( $2 \times 10^7$  and  $1 \times 10^8$ ) prepared with autologous NK cells, while patient 1002 was treated with four infusions of CAR NK cells ( $1 \times 10^8$ ,  $3 \times 10^8$ ,  $5 \times 10^8$ , and  $7 \times 10^8$ ) prepared with allogeneic haploidentical NK cells. Direct local injection into the peritoneal cavity allows the quick access of CAR-NK cells to tumor sites, facilitating the interaction between

**Table 1. NKG2Dp CAR-NK Cells Used in the Clinical Trial**

| NK Cell                                    | Specification                           | Patient 1001  | Patient 1002                                      | Patient 1003                                      |
|--------------------------------------------|-----------------------------------------|---------------|---------------------------------------------------|---------------------------------------------------|
| <b>Cell Expansion</b>                      |                                         |               |                                                   |                                                   |
| Autologous or haploidentical               | N/A                                     | autologous    | haploidentical                                    | haploidentical                                    |
| Blood vol. collected (mL)                  | N/A                                     | 100           | 200                                               | 200                                               |
| % CD56 <sup>+</sup> CD3 <sup>-</sup> cells | initial                                 | 11.7          | 13.2                                              | 35.1                                              |
| % CD56 <sup>+</sup> CD3 <sup>-</sup> cells | before T cell depletion                 | N/A           | 91.9                                              | 96                                                |
| % CD56 <sup>+</sup> CD3 <sup>-</sup> cells | after T cell depletion                  | N/A           | 93.3                                              | 96.6                                              |
| % CD56 <sup>+</sup> CD3 <sup>-</sup> cells | before infusion                         | 93.7 ± 0.49   | 98.6 ± 0.25                                       | 98.6 ± 0.32                                       |
| NK cell expansion fold                     | before infusion                         | 590.8         | 624.8 ± 132.1                                     | 601.1 ± 95.5                                      |
| <b>CAR-NK Cell Release Criteria</b>        |                                         |               |                                                   |                                                   |
| % CD56 <sup>+</sup> CD3 <sup>-</sup> cells | >90                                     | 93.7 ± 0.49   | 98.6 ± 0.25                                       | 98.6 ± 0.32                                       |
| % CD3 <sup>+</sup> cells                   | auto <10; allo <5 × 10 <sup>5</sup> /kg | 5.7 ± 0.45    | 7.7 × 10 <sup>4</sup> ± 7.8 × 10 <sup>4</sup> /kg | 1.7 × 10 <sup>5</sup> ± 9.9 × 10 <sup>4</sup> /kg |
| Endotoxin (EU/mL)                          | <3.5                                    | <0.25         | <0.25                                             | <0.25                                             |
| Mycoplasma <sup>a</sup>                    | negative                                | negative      | negative                                          | negative                                          |
| Sterility (bacterial) <sup>a</sup>         | negative                                | negative      | negative                                          | negative                                          |
| NKG2D MFI after transfection               | >1.2-fold of the original level         | 2.25 ± 0.46   | 1.87 ± 0.59                                       | 2.52 ± 0.43                                       |
| % NKG2D <sup>+</sup> cells                 | >95                                     | 99.3 ± 0.71   | 99.9 ± 0.18                                       | 97.9 ± 2.0                                        |
| Cell viability after transfection          | >80%                                    | 93.6% ± 1.15% | 94.2% ± 3.18%                                     | 94.6% ± 1.50%                                     |
| Cancer cell killing activity               | >60%, CAR-NK:HCT116 <sup>b</sup> = 10:1 | 96.2% ± 5.4%  | 86.6% ± 11.9%                                     | 93.8% ± 7.4%                                      |
| <b>Treatment Scheme</b>                    |                                         |               |                                                   |                                                   |
| Treatment frequency                        | N/A                                     | once a week   | once a week                                       | twice a week                                      |
| Total infusion/injection times             | N/A                                     | 2             | 4                                                 | 6                                                 |
| Dose level (E8 cells per infusion)         | N/A                                     | 0.2, 1        | 1, 3, 5, 7,                                       | 5, 5, 10, 10, 20, 20                              |

MFI, median fluorescent intensity.  
<sup>a</sup>Results were not available at the time of infusion.  
<sup>b</sup>HCT116 human colorectal carcinoma cell line.

transferred cells and cancer cells and limiting the potential on-target and off-tumor risks associated with systemic exposure to the CAR-NK cells.

We observed a significant reduction in the number of epithelial cell adhesion molecule (EpCAM)-positive cancer cells in ascites fluid in both patients (Figure 3A; Figure S11). The cytotoxicity of CAR-NK cells against cancer cells become obvious right after the infusion of the first dose of  $2 \times 10^7$  cells. The number of cancer cells in ascites fluid continued to decrease during the course of treatment and became almost undetectable at the end of treatment. A significant reduction in volume of ascites was also observed in both patients (Figure 3B). Patient 1002 was evaluated for ascites volume change by computed tomographic (CT) imaging, which confirmed ascites reduction (Figure 3C). While the appearance of ascites was initially opalescent in patient 1002, it became clear after i.p. treatment of CAR-NK cells (Figure 3D), a clear indication of clinical benefit in controlling malignant ascites. CT scans were performed in the two patients at baseline and 2 weeks (patient 1001) or 4 weeks (patient 1002) after the initiation of the CAR-NK treatment. Both were found to have stable disease in peritoneal target lesions by CT scanning (Fig-

ure S12). A summary of clinical characteristics of the patients treated with NKG2Dp CAR-NK cells is provided in Table 3.

#### Ultrasound-Guided Percutaneous Injection of CAR-NK Cells Effectively Reduce Tumor Burden in a Patient with Metastatic Colon Cancer in the Liver

Patient 1003 presented with unresectable metastatic colorectal cancer that progressed after three lines of conventional systemic therapy (Table 3) and was treated with six infusions of allogeneic haploidentical CAR-NK cells:  $5 \times 10^8$  CAR-NK cells administered 2×/week for the first week,  $1 \times 10^9$  CAR-NK cells 2×/week in the second week, and  $2 \times 10^9$  CAR-NK cells 2×/week in the third week. Starting from the second infusion and guided by ultrasound (Video S1), half of each dose of CAR-NK cells were percutaneously injected into cancer lesions with high metabolic activity in the liver segment VI, and the rest of the CAR-NK cells were i.p. infused. Measurable clinical responses were observed in the liver region. Doppler ultrasound imaging detected tumor area change from 66.0 mm × 28.5 mm to 46.9 mm × 24.0 mm in the liver region 4 days after one injection of  $2.5 \times 10^8$  CAR-NK cells (Figure 4A). CT and positron emission tomography (PET) scans were performed at baseline and 4 weeks after

**Table 2. Adverse Event Grading Based on CTCAE v4.0**

| Adverse Event (AE) <sup>a</sup> | Patient 1001 | Patient 1002 | Patient 1003 |
|---------------------------------|--------------|--------------|--------------|
| <b>Treatment-Related AE</b>     |              |              |              |
| Fever                           | 1            | 1            | 2            |
| Hypotension                     | 1            | 0            | 0            |
| Fatigue                         | 1            | 1            | 1            |
| Anorexia                        | 1            | 1            | 1            |
| Respiratory distress            | 2            | 1            | 0            |
| Tachycardia                     | 2            | 1            | 0            |
| <b>Non-Treatment-Related AE</b> |              |              |              |
| Nausea                          | 0            | 1            | 0            |
| Vomiting                        | 0            | 2            | 0            |
| Constipation                    | 1            | 0            | 0            |
| Diarrhea                        | 0            | 1            | 0            |
| Bloating                        | 2            | 2            | 0            |
| Abdominal pain                  | 2            | 1            | 0            |
| Back pain                       | 0            | 1            | 0            |
| Tinnitus                        | 1            | 0            | 0            |

<sup>a</sup>AEs labeled as possibly/probably/definitely related were considered as treatment-related AEs and not related or unlikely related as non-treatment-related AEs for this analysis.

the initiation of the CAR-NK treatment. By fludeoxyglucose (FDG) PET/CT imaging, a decrease in the maximum standardized uptake value (SUV<sub>max</sub>) from 8.2 to 0.14 was seen in the liver segment VI after the completion of the treatment (Figures 4B and 4C). Histological examination with H&E staining of specimens collected by needle biopsy (Figure S13) revealed that necrotic tissues with a few intestinal adenocarcinoma cells were seen in the specimens collected from the CAR-NK injected site, whereas intact adenocarcinoma tissues were clearly visible in the specimens collected from a noninjected tumor site (Figure 4D). We further performed immunohistochemistry (IHC) analysis with antibodies against NKG2DL MICA/B and two markers for adenocarcinomas of intestinal origin, Villin, and CDX2. Loss of the expression of NKG2DL MICA/B, Villin, and CDX2 was observed in the biopsy samples collected from the CAR-NK-treated regions (Figure S14). Overall, these findings suggest a therapeutic role for image-guided percutaneous injection of CAR-NK cells, a minimally invasive and repeatable procedure, in inducing a robust local antitumor effect in the patient.

## DISCUSSION

The current study tested NK cells modified with a new type of NKG2D CAR, a CAR composed of the NKG2D ED and DAP12. Different from CD3 $\zeta$  containing three immunoreceptor tyrosine-based activation motifs (ITAMs), DAP12 contains a single ITAM capable of binding Syk and ZAP70 kinases, providing an alternative signaling pathway involved in the antitumor activity of NK cells. Previous studies have demonstrated the functionality of DAP12-containing CARs in NK cell line YTS<sup>40</sup> and in human peripheral blood NK cells.<sup>36</sup> As demonstrated in the current study, compared to human NK cells modified

with the CD3 $\zeta$ -containing NKG2D CAR, NK cells expressing the DAP12-containing NKG2D CAR provided an enhanced *in vitro* cytotoxicity and increased IFN $\gamma$  release. Thus, CAR design with DAP12 signaling domain offers new opportunities to enhance the antitumor activity and specificity of engineered NK cells.

Almost all the previous studies using NKG2D CARs were pursued with immune effector cells transduced with integrating viral vectors. When applied clinically, permanent DNA CAR expression mediated by integrating viral vectors cannot be simply shut off when severe toxicity associated with cytokine storm or on-target and off-tumor toxicity occurs. VanSeggelen et al.<sup>37</sup> have reported a strain- and pre-conditioning-dependent lethal toxicity in mice treated with T cells transduced with retroviral vectors encoding NKG2D DNA CARs, especially when a second-generation NKG2D CAR (NKG2D28 $\zeta$ ) and a NKG2D CAR co-expressed with DAP10 (NKG2D $\zeta$ 10) were used.<sup>38</sup> CARs can also be expressed by transfection through mRNA electroporation. Using short-lived CAR-expressing cells modified with this non-integrating technology, the duration and potency of CAR effects can be controlled by different dosing and infusion schemes. Understandably, the transient expression of CARs on immune cells requires multiple infusions to achieve antitumor effects. It, however, provides good opportunity to test CAR clinical safety. Through discontinuing the infusion of mRNA CAR-modified immune effector cells, an excessive response caused by the toxicity related to recognition of normal tissues and/or cytokine storms can be stopped. Moreover, transfection of mRNA encoding a CAR is more economical in testing new CARs, particularly when performing an initial clinical trial of a novel CAR. There were two previous studies that assessed *in vitro* effects of NKG2D CAR mRNA transfected  $\alpha\beta$  T cells and NK cells, respectively,<sup>27,29</sup> but the impact of these RNA CARs has not been evaluated previously in *in vivo* models. Expression of the NKG2Dp RNA CAR in the current study significantly augmented the tumoricidal activity of NK cells against several solid tumor cell lines *in vitro* and displayed significant anti-tumor effects in a mouse model with established tumors.

After confirming the effectiveness of NKG2D ligand-targeting mRNA CAR NK cells *in vitro* and in animal studies, we initiated a pilot clinical trial (NCT03415100) based on the hypothesis that the local treatment of metastatic colorectal cancer by intraperitoneal infusion and intratumoral injection of the CAR-NK cells would be safe and effective. This clinical trial was performed with three vital safety considerations: (1) human primary NK cells were used as immune effector cells for CAR therapy. Given the limited lifespan of the cytotoxic cells, especially when haploidentical NK cells were used in patients,<sup>5</sup> there will be little concern about persistent CAR-associated side effects; (2) using a non-integrating mRNA electroporation technology for CAR gene transfection further ensures the transient nature of CAR expression; and (3) local treatment instead of systemic delivery of CAR NK cells was performed to limit systemic exposure to CAR cells.

In the current study, clinical-grade CAR-NK cell products that met release criteria were successfully manufactured for all three patients.

**Table 3. Summary of Clinical Characteristics of Three Patients Treated with NKG2Dp CAR-NK Cells**

| Subject ID | Age/Sex | Disease                                                                                                                     | Prior Therapies                                                                | CAR-NK Treatment                      | GVHD     | CT/PET in Target Sites | Status |
|------------|---------|-----------------------------------------------------------------------------------------------------------------------------|--------------------------------------------------------------------------------|---------------------------------------|----------|------------------------|--------|
| 1001       | 51/F    | sigmoid colon cancer + extensive liver metastases, bone and lung metastasis + peritoneal carcinomatosis + malignant ascites | 2016: 8 cycles of capecitabine                                                 | 2 i.p. infusions                      | -        | SD                     | DOD    |
|            |         |                                                                                                                             | 2017: 3 cycles of oxaliplatin and capecitabine (XELOX)                         |                                       |          |                        |        |
|            |         |                                                                                                                             | 2017: 2 cycles of capecitabine                                                 |                                       |          |                        |        |
|            |         |                                                                                                                             | 2017: paclitaxel liposome chemotherapy                                         |                                       |          |                        |        |
| 1002       | 48/F    | sigmoid colon cancer + extensive liver metastases + peritoneal carcinomatosis + malignant ascites                           | 2014: 8 cycles of irinotecan + fluorouracil + cetuximab                        | 4 i.p. infusions                      | negative | SD                     | DOD    |
|            |         |                                                                                                                             | 2014: surgical resection of liver metastases                                   |                                       |          |                        |        |
|            |         |                                                                                                                             | 2015: 4 cycles of irinotecan + fluorouracil + cetuximab                        |                                       |          |                        |        |
|            |         |                                                                                                                             | 2017: 8 cycles of capecitabine                                                 |                                       |          |                        |        |
| 1003       | 51/M    | rectal cancer + subcapsular liver metastases                                                                                | 2017: surgical resection of metastases in right testicle and sigmoid colostomy | 6 i.p. infusions + 5 local injections | negative | CMR/SD                 | DOD    |
|            |         |                                                                                                                             | 2017: 2 cycles of oxaliplatin + capecitabine                                   |                                       |          |                        |        |
|            |         |                                                                                                                             | 2017: 1 cycle of irinotecan + fluorouracil                                     |                                       |          |                        |        |
|            |         |                                                                                                                             | 2018: 3 cycles of irinotecan + fluorouracil + bevacizumab                      |                                       |          |                        |        |

M, male; F, female; i.p., intraperitoneal; SD, stable disease in target site; CMR, complete metabolic response; DOD, death of disease.

This technical implantation success rate is the most important feasibility endpoint. However, due to transient CAR expression feature, we were unable to evaluate the *in vivo* fate of adoptively transferred CAR-NK cells. All three patients met the safety endpoint, as the CAR-NK cells were well tolerated with no serious adverse events, including high-grade cytokine release syndrome. Multiple dose levels of CAR-NK cells were tested, but no dose-limiting toxicities occurred.

This study further provides the direct evidence that adoptively transferred NKG2Dp CAR-NK cells did recognize tumor cells and display antitumor effector functions in patients with metastatic colorectal cancer. Notably, our small patient population consisted of heavily treated, refractory patients at a late stage of colorectal cancer with multifocal metastasis and were expected to have poor survival outcomes. In two patients with malignant ascites and treated with intraperitoneal infusion of the CAR-NK cells, the number of tumor cells in ascites was apparently reduced even after infusion of a single low dose of cells and to an almost undetectable level at the end of the treatment (Figure 3A). In the third patient who was treated with ultrasound-guided percutaneous injection of CAR-NK cells in the liver, complete metabolic response was detected in the injection site (Figures 4B and 4C), demonstrating the direct effects of CAR-NK cells on metastatic colorectal cancer. The on-target argument is further supported by the findings that there was a loss of NKG2DL expression in the biopsy samples collected from the injected site (Figure S14) and that necrosis was found in the same biopsy samples (Figure 4D). In combination with the findings in the mouse tumor model shown in Figure 2 that the growth of NKG2DL-positive tumors was effectively inhibited by NKG2Dp CAR-NK cells but not by NK cells expressing a non-relevant CAR or NK cells alone, we concluded that the observed complete metabolic response was likely to be attributable, at least in part, to specific cancer cell lysis effects mediated by NKG2Dp CAR-NK cells.

NK cells are a promising alternative to T cells for CAR-based therapies owing to a number of reasons.<sup>1,19,22</sup> First, NK cells express an array of endogenous activating receptors that can recognize cancer cells and trigger tumor lysis via natural cytotoxicity. Even if a CAR target antigen was downregulated on cancer cells during treatment, CAR-expressing NK cells would still be able to function. Second, unlike T cells, NK cells are unable to produce autocrine growth factors such as IL-2, and this will limit their lifespan. As such, NK cells are expected to disappear relatively rapidly from the circulation, reducing the risk of long-term adverse events and eliminating the need for introducing “suicide genes” to remove CAR-expressing cells. Third, it is generally accepted that NK cells do not induce GVHD or other alloimmune or autoimmune toxicities, permitting “off-the-shelf” cellular immunotherapy with allogeneic NK cells from healthy donors. It is foreseeable that an allogeneic cell approach allows large-scale mass production of cell therapeutics associated with reduced laboriousness and simplified logistics of cell culture operations, thus significantly increasing cost effectiveness. As an allogeneic cell approach allows standardized manufacture, it would certainly be helpful to eliminate variability in the quality of cellular products, thus facilitating reliable comparative analysis of clinical outcomes.

In conclusion, adoptive transfer of NKG2D CAR-expressing NK cells as reported in the current study provides a new option to improve the outcome of cancer immunotherapy and is especially attractive in developing safe “off-the-shelf” CAR therapeutics for allogeneic cell therapy.

## MATERIALS AND METHODS

### Cells and Cell Culture Conditions

Human peripheral blood mononuclear cells (PBMCs) used for pre-clinical studies were isolated from fresh buffy coats by density

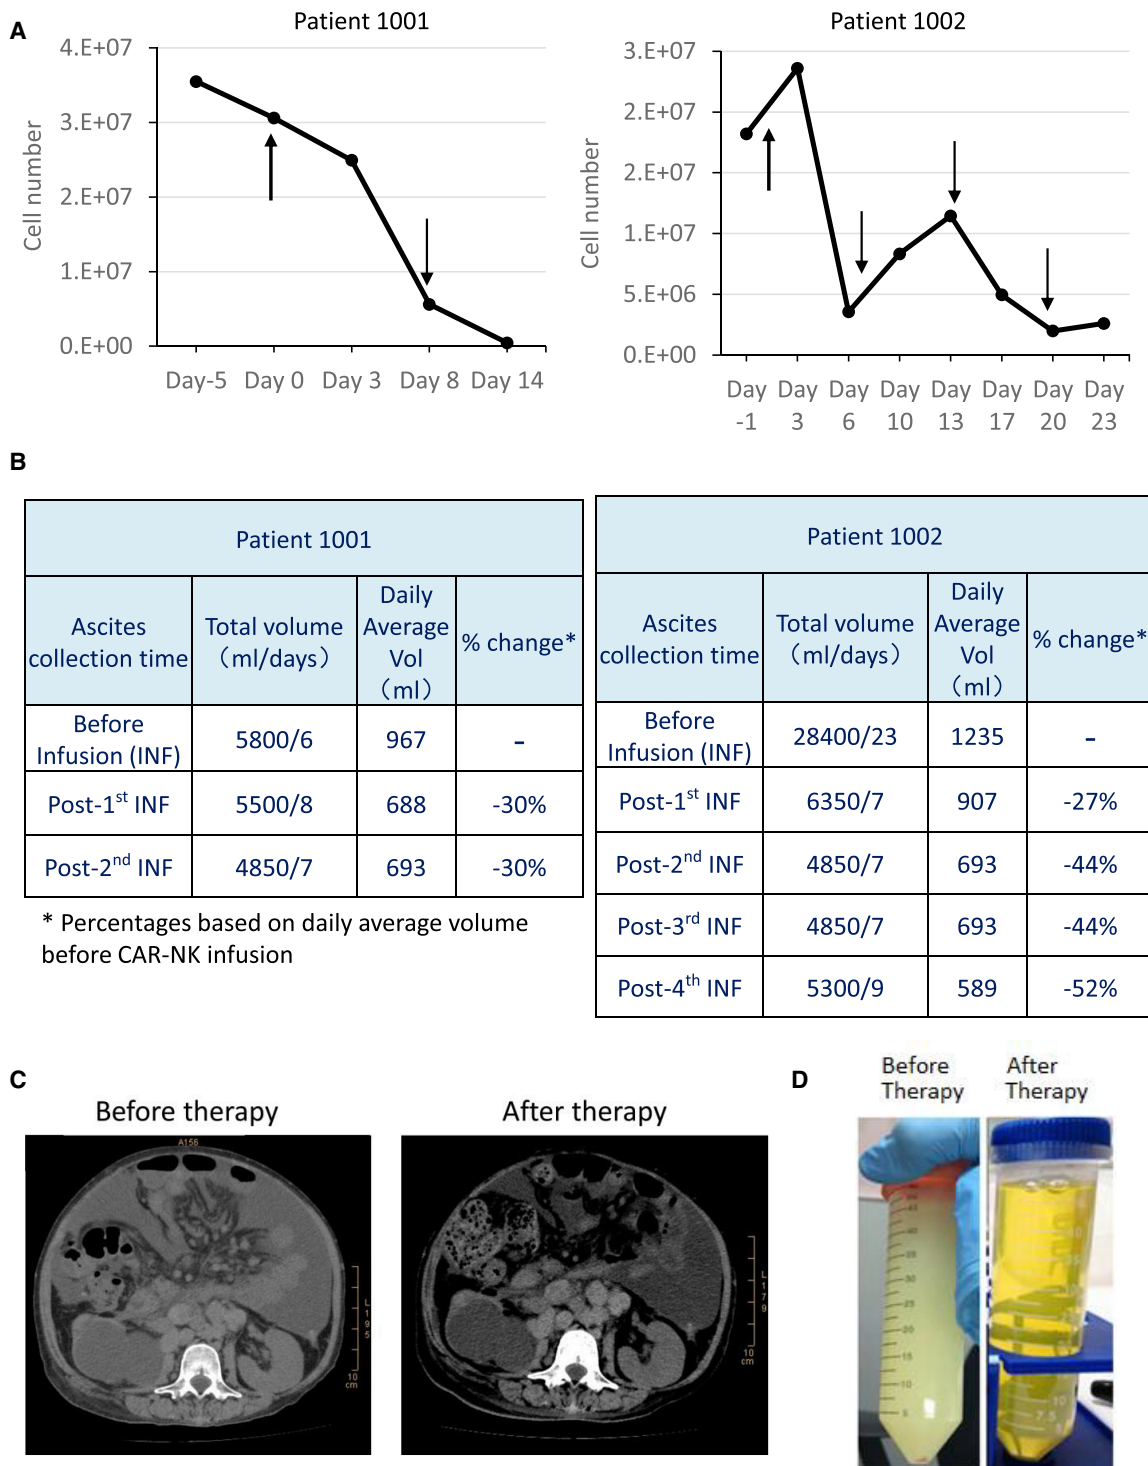

**Figure 3. Effects of Intraperitoneal Injection of CAR-NK Cells on Malignant Ascites**

(A) The number of EpCAM-positive cancer cells in ascites fluid following treatment. Two and four injections of CAR-NK cells were given to patients 1001 and 1002, respectively, as indicated by arrows. (B) Changes in ascites generation in patients ID001 and ID002. (C) Computed tomography (CT) findings in patient 1002. While a large volume of ascites was observed before treatment (left), the amount of ascites was reduced significantly after four courses of CAR NK-cell injections. (D) The appearance of ascites from patient 1002 before and after four courses of CAR-NK cell injections.



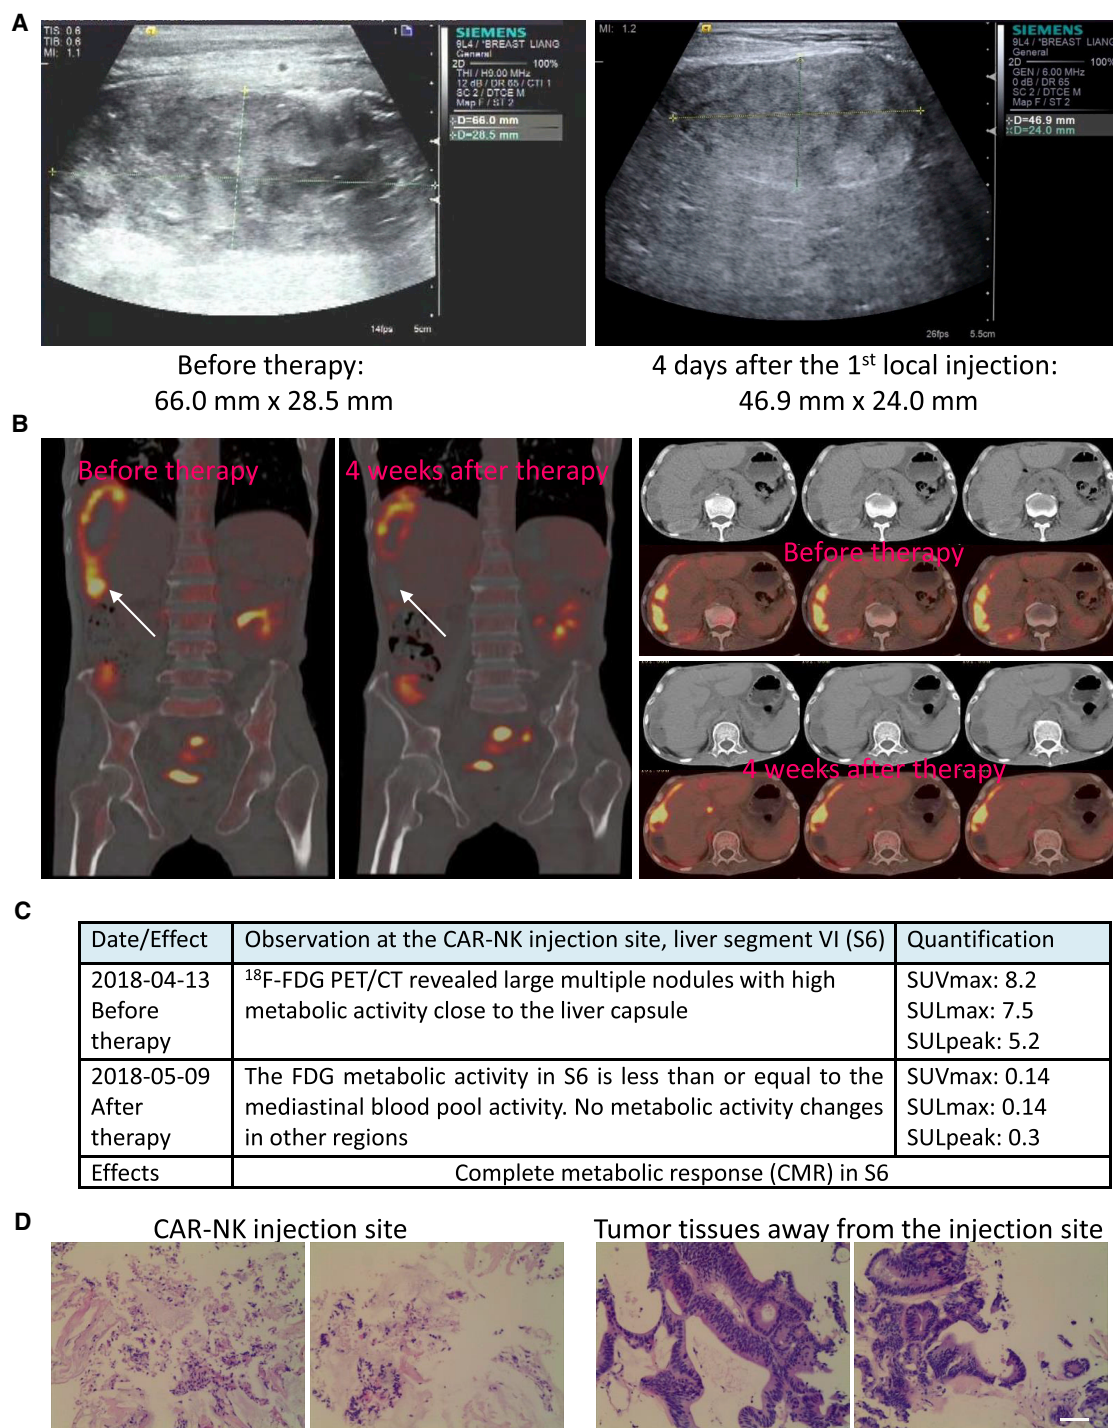

**Figure 4. Effects of Ultrasound-Guided Local Injection of CAR-NK Cells on Metastatic Colon Cancer**

(A) Effects of local injection of CAR-NK cells in the liver region as demonstrated with ultrasound imaging in patient 1003. (B) Positron emission tomography-computed tomography (PET-CT) images of cancer lesions. Left: Coronal PET-CT scan with evidence of CAR-NK effects in S6. Right: cross-section images of CT and PET/CT to show changes in S6 after CAR-NK therapy. (C) Quantification of the metabolic activity of tumor lesions in S6. (D) Histological examination of needle biopsy specimens. Left: specimens collected from the CAR-NK injected site. Right: specimens collected from a tumor site. Scale, 2 cm.

gradient centrifugation using Ficoll-Paque (GE Healthcare, Milwaukee, WI, USA). NK cell expansion was carried out using NK cell growth media composing of GMP serum-free AIM V (Life Technologies, Gaithersburg, MD, USA) supplemented with 1% human AB serum (Gemini Bio-Products, Calabasas, CA, USA) and 50 IU/mL IL-2 (PeproTech, Rocky Hill, NJ, USA). PBMCs were co-cultured with gamma-irradiated K562 feeder cells at a 1:1 ratio in NK cell growth media. In summary,  $2 \times 10^6$  PBMCs were co-cultured with  $2 \times 10^6$  K562 feeder cells expressing mbll15, 4-1BBL, and mbIL21 in 10 mL of NK media in standing T75 flasks. Half media change was carried out every 2 days for 10 days. Then  $2 \times 10^6$  expanded cells were further co-cultured with  $2 \times 10^6$  K562 feeder cells in 10 mL of NK cell media in standing T75 flasks. Half media change was carried out every 2 days for 7 days. By using this method, NK cells, with an initial frequency of approximately 10% in PBMCs, could be enriched to 90% in 17 days and undergo around 7000-fold expansion. NK cells can possibly be cryopreserved, but recovery was poor upon thawing. Human solid tumor cell lines SKOV3-luc and Detroit562 were purchased from ATCC (Manassas, VA, USA) and HCT116-luc was purchased from Perkin Elmer (Norwalk, CT, USA). Detroit562 was cultured in Eagle's minimal essential medium (EMEM) (ATCC) supplemented with 10% fetal bovine serum (FBS) (Hyclone, Logan, UT, USA). SKOV3-luc and HCT116-luc were cultured in McCoy's 5A supplemented with 10% FBS.

#### Construction of Chimeric NKG2D CAR Vectors and Generation of CAR NK Cells

To construct NKG2D RNA CAR vectors, the ED of human NKG2D was amplified by PCR from a PBMC cDNA library. NKG2D CAR vectors were generated by fusing NKG2D-ED to the CD8 $\alpha$  hinge and transmembrane region and DAP12 or CD3 $\zeta$  signaling moiety. The mGFP control vector was generated by replacing the NKG2D ED part with the GFP encoding sequence. PCR was performed to generate mRNA template encoding the NKG2D CARs, which were then transcribed *in vitro* to mRNA molecules and electroporated into NK cells. For details, see the [Supplemental Information](#).

#### Flow Cytometric Analysis, Cytotoxicity Assay, and Animal Experiments

Flow cytometric analysis was performed with Accuri C6 cytometer (BD Biosciences, Franklin Lakes, NJ, USA). The cytolytic activity of CAR-modified NK cells was examined with a non-radioactive method (DELFA EuTDA cytotoxicity reagents kit, Perkin Elmer, MA, USA).

NSG mice were inoculated via i.p. injection of  $1 \times 10^7$  HCT116-luc or SKOV3-Luc cells to generate tumor models. To investigate *in vivo* anti-tumor effects of CAR-NK cells,  $1 \times 10^7$  of human NK cells electroporated with NKG2Dp RNA CAR were i.p. injected into tumor-bearing mice twice a week for 3 weeks, starting from 7 days after tumor cell inoculation.

For details, see the [Supplemental Information](#).

#### Patient Eligibility and Clinical Study Design

With an IRB approval from the Third Affiliated Hospital of Guangzhou Medical University (Guangzhou, China), an open label pilot study (NCT03415100) was initiated to evaluate the safety and feasibility of NKG2D CAR-NK cell therapy in three patients with chemotherapy-refractory metastatic colorectal cancer. The clinical study was performed in accordance with the principles of the Declaration of Helsinki. Written informed consent was obtained from each patient before they entered the study. Eligible patients were diagnosed with colorectal cancer via pathological examinations and with metastatic disease that was confirmed via adequate radiological imaging. The patients failed at least two lines of systemic therapy. Exclusion criteria ([Supplemental Information](#)) were as follows: acute or chronic infections, relevant concomitant hematological, cardiovascular, pulmonary, hepatic, renal, pancreatic, or endocrinal disease, with immune deficiency, autoimmune diseases, severe allergic disorders, or exposure to cell-based therapy in the preceding 3 months. Those receiving systemic steroid therapy or who were pregnant or lactating were also excluded.

The clinical trial scheme is shown in [Table 1](#) and [Figure S6](#). Patients received multiple rounds of CAR-NK cell infusions. The primary endpoint was to determine the feasibility and safety of the treatments. Severity of adverse events was graded using the National Cancer Institute CTCAE v4.0. The secondary endpoints included assessment of clinical responses to NKG2D CAR-NK cell therapy. CT and PET examinations were performed at baseline and 2 weeks (patient 1001) or 4 weeks (patient 1002 and 1003) after the initiation of the CAR-NK treatment. The study radiologists (Tianfa Dong, Jinshan Zhang) graded responses according to modified RECIST (mRECIST).

To prepare CAR-NK cells for the clinical study, blood samples were collected from a patient (100 mL) or haploidentical family donors (200 mL) to isolate PBMCs. NK cells were expanded from PBMCs as described above in G-Rex 100 vessels (Wilson Wolf Manufacturing), supplemented with 1% human AB serum (Gemini Bio-Products, Calabasas, CA, USA) and 50 IU/mL human recombinant IL-2 (Beijing Four Rings Biopharmaceutical, China). NKG2Dp CAR NK cells were prepared as described above and in the [Supplemental Information](#) ([Figure S1](#)) and administered i.p. via a peritoneal access catheter to patients. Percutaneous injection of CAR-NK cells was performed under real-time ultrasound (SIEMENS Acuson S2000) guidance with a 3 to 6 MHz probe. The patient was placed in the left lateral position, and the ultrasound scan was performed on the right anterior iliac crest. Two tumor sites without major blood vessels were selected for the injection,  $5 \times 10^8$  to  $2 \times 10^9$  CAR NK cells in 50–70 mL saline each time, through the seventh and eighth rib intercostal space with a 19G disposable puncture needle. To evaluate the antitumor effects of NKG2D CAR-NK cell therapy on malignant ascites, peritoneal lavage fluid was collected through a catheter. Tumor cells in ascites were analyzed by flow cytometry for the presence of EpCAM-positive cells.

### Statistical Analysis

Data are presented as mean  $\pm$  standard deviation (SD). All statistics were performed with GraphPad Prism 7. *p* values  $< 0.05$  were considered significant.

### SUPPLEMENTAL INFORMATION

Supplemental Information can be found online at <https://doi.org/10.1016/j.ymthe.2019.03.011>.

### AUTHOR CONTRIBUTIONS

L.X. and X.H.X. conceived and designed the research. L.X., H.G., and X.L. performed the preclinical experiments. L.X., D.C., H.G., Y.S., N.H., H.X., Q.J., L.S., and W.L. performed the clinical trial experiments. L.X., D.C., H.G., K.W., G.Y., T.D., S.W., P.Z., J.Z., W.L., J.R., Y.T., C.C., and X.H.X. analyzed data. L.X. and X.H.X. wrote the manuscript.

### CONFLICTS OF INTEREST

The costs of the study were partially covered by Youshan Biomedical Co., Ltd. (Hangzhou, China). The study sponsors had no involvement in study design, collection and interpretation of data, writing the report, and the decision to submit the report for publication. All other authors in the Third Affiliated Hospital of Guangzhou Medical University and Guangzhou Regenerative Medicine, Health-Guangdong Laboratory (GRMH-GDL), Guangzhou, and the Affiliated Hangzhou First's People Hospital, Zhejiang University School of Medicine, Hangzhou, China, have declared that there are no financial conflicts of interest related to this work.

### ACKNOWLEDGMENTS

This work was supported by the Science and Technology Planning Projects of Guangdong Province, China (grants 2016B090918130 and 2016ZC0142) and the General Project of Science and Technology from Guangzhou City (grant 201707010234).

### REFERENCES

- Morvan, M.G., and Lanier, L.L. (2016). NK cells and cancer: you can teach innate cells new tricks. *Nat. Rev. Cancer* 16, 7–19.
- Ruggeri, L., Capanni, M., Urbani, E., Perruccio, K., Shlomchik, W.D., Tosti, A., Posati, S., Rogaia, D., Frassoni, F., Aversa, F., et al. (2002). Effectiveness of donor natural killer cell alloreactivity in mismatched hematopoietic transplants. *Science* 295, 2097–2100.
- Guillerey, C., Huntington, N.D., and Smyth, M.J. (2016). Targeting natural killer cells in cancer immunotherapy. *Nat. Immunol.* 17, 1025–1036.
- Grossenbacher, S.K., Aguilar, E.G., and Murphy, W.J. (2017). Leveraging natural killer cells for cancer immunotherapy. *Immunotherapy* 9, 487–497.
- Miller, J.S., Soignier, Y., Panoskalis-Mortari, A., McNearney, S.A., Yun, G.H., Fautsch, S.K., McKenna, D., Le, C., Defor, T.E., Burns, L.J., et al. (2005). Successful adoptive transfer and in vivo expansion of human haploidentical NK cells in patients with cancer. *Blood* 105, 3051–3057.
- Iliopoulou, E.G., Kountourakis, P., Karamouzis, M.V., Doufexis, D., Ardavanis, A., Baxevasis, C.N., Rigatos, G., Papamichail, M., and Perez, S.A. (2010). A phase I trial of adoptive transfer of allogeneic natural killer cells in patients with advanced non-small cell lung cancer. *Cancer Immunol. Immunother.* 59, 1781–1789.
- Geller, M.A., Cooley, S., Judson, P.L., Ghebre, R., Carson, L.F., Argenta, P.A., Jonson, A.L., Panoskalis-Mortari, A., Curtisinger, J., McKenna, D., et al. (2011). A phase II study of allogeneic natural killer cell therapy to treat patients with recurrent ovarian and breast cancer. *Cytotherapy* 13, 98–107.
- Yang, Y., Lim, O., Kim, T.M., Ahn, Y.O., Choi, H., Chung, H., Min, B., Her, J.H., Cho, S.Y., Keam, B., et al. (2016). Phase I Study of Random Healthy Donor-Derived Allogeneic Natural Killer Cell Therapy in Patients with Malignant Lymphoma or Advanced Solid Tumors. *Cancer Immunol. Res.* 4, 215–224.
- Pahl, J., and Cerwenka, A. (2017). Tricking the balance: NK cells in anti-cancer immunity. *Immunobiology* 222, 11–20.
- Raulet, D.H., Gasser, S., Gowen, B.G., Deng, W., and Jung, H. (2013). Regulation of ligands for the NKG2D activating receptor. *Annu. Rev. Immunol.* 31, 413–441.
- Li, L., Chen, A., Chaudhuri, A., Kambham, N., Sigdel, T., Chen, R., and Sarwal, M.M. (2010). Compartmental localization and clinical relevance of MICA antibodies after renal transplantation. *Transplantation* 89, 312–319.
- Hüe, S., Mention, J.J., Monteiro, R.C., Zhang, S., Cellier, C., Schmitz, J., Verkarre, V., Fodil, N., Bahram, S., Cerf-Bensussan, N., and Caillat-Zucman, S. (2004). A direct role for NKG2D/MICA interaction in villous atrophy during celiac disease. *Immunity* 21, 367–377.
- Groh, V., Rhinehart, R., Secrist, H., Bauer, S., Grabstein, K.H., and Spies, T. (1999). Broad tumor-associated expression and recognition by tumor-derived gamma delta T cells of MICA and MICB. *Proc. Natl. Acad. Sci. USA* 96, 6879–6884.
- Groh, V., Bahram, S., Bauer, S., Herman, A., Beauchamp, M., and Spies, T. (1996). Cell stress-regulated human major histocompatibility complex class I gene expressed in gastrointestinal epithelium. *Proc. Natl. Acad. Sci. USA* 93, 12445–12450.
- Spear, P., Wu, M.R., Sentman, M.L., and Sentman, C.L. (2013). NKG2D ligands as therapeutic targets. *Cancer Immun.* 13, 8.
- Zhang, J., Basher, F., and Wu, J.D. (2015). NKG2D Ligands in Tumor Immunity: Two Sides of a Coin. *Front. Immunol.* 6, 97.
- López-Soto, A., Huergo-Zapico, L., Acebes-Huerta, A., Villa-Alvarez, M., and Gonzalez, S. (2015). NKG2D signaling in cancer immunosurveillance. *Int. J. Cancer* 136, 1741–1750.
- Demoulin, B., Cook, W.J., Murad, J., Graber, D.J., Sentman, M.L., Loney, C., Gilham, D.E., Sentman, C.L., and Aagaugue, S. (2017). Exploiting natural killer group 2D receptors for CAR T-cell therapy. *Future Oncol.* 13, 1593–1605.
- Klingemann, H. (2014). Are natural killer cells superior CAR drivers? *OncoImmunology* 3, e28147.
- Glienke, W., Esser, R., Priesner, C., Suerth, J.D., Schambach, A., Wels, W.S., Grez, M., Kloess, S., Arseniev, L., and Koehl, U. (2015). Advantages and applications of CAR-expressing natural killer cells. *Front. Pharmacol.* 6, 21.
- Rezvani, K., Rouce, R., Liu, E., and Shpall, E. (2017). Engineering Natural Killer Cells for Cancer Immunotherapy. *Mol. Ther.* 25, 1769–1781.
- Mehta, R.S., and Rezvani, K. (2018). Chimeric Antigen Receptor Expressing Natural Killer Cells for the Immunotherapy of Cancer. *Front. Immunol.* 9, 283.
- Zhang, T., Lemoi, B.A., and Sentman, C.L. (2005). Chimeric NK-receptor-bearing T cells mediate antitumor immunotherapy. *Blood* 106, 1544–1551.
- Barber, A., Rynda, A., and Sentman, C.L. (2009). Chimeric NKG2D expressing T cells eliminate immunosuppression and activate immunity within the ovarian tumor microenvironment. *J. Immunol.* 183, 6939–6947.
- Barber, A., and Sentman, C.L. (2009). Chimeric NKG2D T cells require both T cell- and host-derived cytokine secretion and perforin expression to increase tumor antigen presentation and systemic immunity. *J. Immunol.* 183, 2365–2372.
- Zhang, T., Barber, A., and Sentman, C.L. (2006). Generation of antitumor responses by genetic modification of primary human T cells with a chimeric NKG2D receptor. *Cancer Res.* 66, 5927–5933.
- Lehner, M., Götz, G., Proff, J., Schaft, N., Dörrie, J., Full, F., Ensser, A., Müller, Y.A., Cerwenka, A., Abken, H., et al. (2012). Redirecting T cells to Ewing's sarcoma family of tumors by a chimeric NKG2D receptor expressed by lentiviral transduction or mRNA transfection. *PLoS ONE* 7, e31210.
- Spear, P., Barber, A., Rynda-Apple, A., and Sentman, C.L. (2012). Chimeric antigen receptor T cells shape myeloid cell function within the tumor microenvironment through IFN- $\gamma$  and GM-CSF. *J. Immunol.* 188, 6389–6398.

29. Chang, Y.H., Connolly, J., Shimasaki, N., Mimura, K., Kono, K., and Campana, D. (2013). A chimeric receptor with NKG2D specificity enhances natural killer cell activation and killing of tumor cells. *Cancer Res.* 73, 1777–1786.
30. Song, D.G., Ye, Q., Santoro, S., Fang, C., Best, A., and Powell, D.J., Jr. (2013). Chimeric NKG2D CAR-expressing T cell-mediated attack of human ovarian cancer is enhanced by histone deacetylase inhibition. *Hum. Gene Ther.* 24, 295–305.
31. Spear, P., Barber, A., and Sentman, C.L. (2013). Collaboration of chimeric antigen receptor (CAR)-expressing T cells and host T cells for optimal elimination of established ovarian tumors. *OncoImmunology* 2, e23564.
32. Spear, P., Barber, A., Rynda-Applé, A., and Sentman, C.L. (2013). NKG2D CAR T-cell therapy inhibits the growth of NKG2D ligand heterogeneous tumors. *Immunol. Cell Biol.* 91, 435–440.
33. Sentman, C.L., and Meehan, K.R. (2014). NKG2D CARs as cell therapy for cancer. *Cancer J.* 20, 156–159.
34. Fernández, L., Metais, J.Y., Escudero, A., Vela, M., Valentín, J., Vallcorba, I., Leivas, A., Torres, J., Valeri, A., Patiño-García, A., et al. (2017). Memory T Cells Expressing an NKG2D-CAR Efficiently Target Osteosarcoma Cells. *Clin. Cancer Res.* 23, 5824–5835.
35. Lanier, L.L., Corliss, B.C., Wu, J., Leong, C., and Phillips, J.H. (1998). Immunoreceptor DAP12 bearing a tyrosine-based activation motif is involved in activating NK cells. *Nature* 391, 703–707.
36. Töpfer, K., Cartellieri, M., Michen, S., Wiedemuth, R., Müller, N., Lindemann, D., Bachmann, M., Füssel, M., Schackert, G., and Temme, A. (2015). DAP12-based activating chimeric antigen receptor for NK cell tumor immunotherapy. *J. Immunol.* 194, 3201–3212.
37. VanSeggelen, H., Hammill, J.A., Dvorkin-Gheva, A., Tantaló, D.G., Kwicien, J.M., Denisova, G.F., Rabinovich, B., Wan, Y., and Bramson, J.L. (2015). T Cells Engineered With Chimeric Antigen Receptors Targeting NKG2D Ligands Display Lethal Toxicity in Mice. *Mol. Ther.* 23, 1600–1610.
38. Lynn, R.C., and Powell, D.J., Jr. (2015). Strain-dependent Lethal Toxicity in NKG2D Ligand-targeted CAR T-cell Therapy. *Mol. Ther.* 23, 1559–1561.
39. Sentman, M.L., Murad, J.M., Cook, W.J., Wu, M.R., Reder, J., Baumeister, S.H., Dranoff, G., Fanger, M.W., and Sentman, C.L. (2016). Mechanisms of Acute Toxicity in NKG2D Chimeric Antigen Receptor T Cell-Treated Mice. *J. Immunol.* 197, 4674–4685.
40. Müller, N., Michen, S., Tietze, S., Töpfer, K., Schulte, A., Lamszus, K., Schmitz, M., Schackert, G., Pastan, I., and Temme, A. (2015). Engineering NK Cells Modified With an EGFRvIII-specific Chimeric Antigen Receptor to Overexpress CXCR4 Improves Immunotherapy of CXCL12/SDF-1 $\alpha$ -secreting Glioblastoma. *J. Immunother.* 38, 197–210.

## **Supplemental Information**

### **Adoptive Transfer of NKG2D CAR**

#### **mRNA-Engineered Natural Killer Cells**

#### **in Colorectal Cancer Patients**

**Lin Xiao, Dongzhi Cen, Haining Gan, Yan Sun, Nanqi Huang, Hanzhen Xiong, Qiongmei Jin, Liqun Su, Xuejuan Liu, Kejian Wang, Guangrong Yan, Tianfa Dong, Shangbiao Wu, Pengzhi Zhou, Jinshan Zhang, Weixiang Liang, Junlan Ren, Yaoshu Teng, Can Chen, and Xue Hu Xu**

# Adoptive Transfer of NKG2D CAR mRNA-Engineered Natural Killer Cells in Colorectal Cancer Patients

## SUPPLEMENTAL INFORMATION

### MATERIALS AND METHODS

#### ***Construction of chimeric NKG2D CAR vectors and generation of CAR-NK cells***

To construct NKG2D mRNA CAR vectors, the basal backbone vector pFBCMV-T7 was generated by inserting into pFastbac1 vector (Life Technologies, Carlsbad, CA) a synthetic sequence containing the T7 promoter, a 5'UTR with Kozak sequence, a multiple cloning site with *EcoRI*, *SphI*, *Sall*, *Hind III* and *Clal*, the GM-CSF signal peptide encoding sequence (SP) and the alpha-globin 3'UTR sequence. The extracellular domain of human NKG2D (NKG2D-ED, uniprot P26718-1, amino acids 83-216) was amplified by PCR from a PBMC cDNA library using the primers 5'-gcgcgcatgccttcaaccaagaagttcaaattcc-3' (forward primer with *SphI* site) and 5'-acgaagctagccacagtcctttgcatcacagatgtacgtattggag-3' (reverse primer with *NheI* site). NKG2D CAR vector was generated by fusing NKG2D-ED to the CD8 $\alpha$  hinge and transmembrane region (CD8 H-TM, uniprot P01732, amino acids 128-210) and CD3 $\zeta$  signaling moiety (P20963, amino acids 52-164) (NKG2Dz), or DAP12 (uniprot O43914, amino acids 62-113) (NKG2Dp), and then subcloned into pFBCMV-T7 with *EcoRI* and *Sall*. The control vector was generated by replacing the NKG2D ED part of the NKG2Dz vector with EGFP encoding sequence (the start codon removed) by *SphI* and *NheI*.

To generate mRNA molecules encoding the NKG2D CARs, PCR was performed using the above pFBCMV-T7 vectors as DNA templates, a forward primer CMV-F (5'-atccgctcgagtagttattaatagtaatcaattacggggtc-3'), and reverse primer T150-R. Capped mRNA was generated through *in vitro* transcription of the PCR DNA templates using the mMESAGE mMACHINE T7 ULTRA transcription kit (Invitrogen) or the mScript™ RNA system (Epicentre, Madison, WI). For mRNA CAR NK cell generation, NK cells were mixed with NKG2D CAR mRNA and electroporated in a 2 or 4-mm cuvette (Bio-Rad, Hercules, CA) using a NEPA21 electroporator (Nepagene, Chiba, Japan) or a BTX electroporator (AgilePulse, Holliston, MA). The electroporated NK cells were rested overnight before use.

#### ***Flow cytometric analysis and cytotoxicity assay***

For flow cytometric analysis,  $5 \times 10^5$  to  $1 \times 10^6$  cells were suspended in 100  $\mu$ L cold MACS buffer (Miltenyi Biotech, Germany). Antibodies were added according to the manufacturer's recommendations and incubated at 4°C for 15 min. After washing with MACS buffer, the cells were re-suspended in 500  $\mu$ L MACS buffer for flow-cytometry analysis with Accuri C6 cytometer (BD Biosciences, Franklin Lakes, NJ). To detect the NKG2D expression on NK cells, phenotyping was analyzed by single-color staining with APC-anti-NKG2D (Miltenyi). To detect NKG2D ligand expression

on tumor cells, phenotyping was analyzed by single-color staining with anti-human MICA/MICB FITC (Miltenyi), human ULBP-1 PE (R&D Systems, Minneapolis, MN), ULBP2/5/6 APC (R&D), ULBP-3 APC (R&D), and ULBP-4/RAET1E APC (R&D).

The cytolytic activity of CAR-modified NK cells was examined with a non-radioactive method (DELFIA EuTDA Cytotoxicity Reagents kit, PerkinElmer, MA). Time-resolved fluorescence was measured in Victor3 multilabel plate counter (Perkin Elmer). The effector to target (E:T) ratios used ranged from 5:1 to 0.5:1. Control groups were set up to measure spontaneous release (only target cells added), maximum release (target cells added with 10  $\mu$ L lysis buffer), and medium background (no cell added). Killing efficacy was calculated by using the following formula:

$$\% \text{ Specific release} = \frac{\text{Experimental release (counts)} - \text{Spontaneous release (counts)}}{\text{Maximum release (counts)} - \text{Spontaneous release (counts)}} \times 100$$

### ***Animal experiments***

Non-obese diabetic/severe combined immunodeficiency/IL-2R $\gamma$ null (NSG) mice (6-8 weeks old, female) were used in the current study. Mice were inoculated via intraperitoneal (i.p.) injection of  $1 \times 10^7$  HCT116-luc. On day 7 post-tumor inoculation, tumor engraftment was confirmed by live bioluminescence imaging (BLI) monitored using an IVIS Spectrum Imaging platform with Living Image software (PerkinElmer). Mice with similar BLI signal intensity were randomly divided into different treatment groups, 5 mice per group. To investigate *in vivo* anti-tumor effects,  $1 \times 10^7$  of immune effector cells electroporated with NKG2D $\gamma$  RNA CAR were i.p. injected into tumor-bearing mice twice a week for 3 weeks. Mice treated with PBS or mock NK cells were used as controls. The mice were followed with serial weekly imaging to assess the tumor burden. All luminescent signals and images were acquired and analysed with the Xenogen living imaging software v2.5. Behaviour and survival of the mice were monitored closely. Humane endpoints were used and mice were euthanized by cervical dislocation under sodium pentobarbital anesthesia upon signs of distress such as swollen belly due to tumor ascites formation, seizures, tremors, labored or difficulty in breathing, significant weight loss (> 15% body weight), signs of emaciation (i.e., prominent skeletal structures), impaired ambulation, inability to remain upright, or evidence of moribund condition. The survival curves were established based on the dates when mice were found dead or euthanized.

### ***Clinical study design***

A one-way, open-label, pilot study (NCT03415100) was designed to evaluate the manufacturing feasibility and safety of mRNA transfected NKG2D-CAR NK cells in patients with advanced colorectal cancer. The study was performed according to the principles of the Declaration of Helsinki. The

research protocol was reviewed and approved by the Ethical Committee of the Third Affiliated Hospital of Guangzhou Medical University (Guangzhou, China). To meet inclusion criteria, patients aged between 18 - 70 years had to have histologically or cytologically proven metastatic colorectal cancer, an expected survival of at least 3 months, an Eastern Cooperative Oncology Group performance status (PS) of 0-3, normal kidney, liver, and bone marrow function, and be resistant to standard therapies (failed at least two lines of systemic therapy). Exclusion criteria were acute or chronic infections, relevant concomitant hematological, cardiovascular, pulmonary, hepatic, renal, pancreatic or endocrinal disease, with immune deficiency, autoimmune diseases, severe allergic disorders, or exposure to cell-based therapy in the preceding 3 months. Those receiving systemic steroid therapy or who were pregnant or lactating were also excluded.

NK cells expanded from a patient (auto-NK) or haploidentical family donors (allo-NK) were used to prepare NKG2Dp-CAR NK cells. After patients received an i.p. catheter placed under ultrasound guidance in local anesthesia, freshly prepared CAR-NK cells met the releasing criteria (Table 1) were intraperitoneally infused via the i.p. catheter into patients. Patient1001 received  $2 \times 10^7$  NKG2Dp-CAR NK cells administered on day 0, followed by a second infusion with  $1 \times 10^8$  NKG2Dp-CAR NK cells on day 7. The patient was withdrawn from the study after two rounds of NK cell infusion due to disease progression although promising signs of immunological reactivity reflected by the reduction of tumor cells in ascites were observed. Patient1002 received 4 infusions of NKG2Dp-CAR NK cells on days 0 ( $1 \times 10^8$ ), 7 ( $3 \times 10^8$ ), 14 ( $5 \times 10^8$ ), and 21 ( $7 \times 10^8$ ), respectively. Patient1003 was treated with 6 infusions of allogeneic haploidentical CAR-NK cells:  $5 \times 10^8$  CAR-NK cells administered 2x/week for the 1<sup>st</sup> week,  $1 \times 10^9$  CAR-NK cells 2x/week in the 2<sup>nd</sup> week, and  $2 \times 10^9$  CAR-NK cells 2x/week in the 3<sup>rd</sup> week. Specifically, the patient received  $5 \times 10^8$  CAR-NK cells administered intraperitoneally on day 0. Starting from the 2<sup>nd</sup> infusion on day 3 and guided by ultrasound, half of each dose of CAR-NK cells were percutaneously injected into cancer lesions with high metabolic activity in the liver segment VI, i.e.  $2.5 \times 10^8$ ,  $5 \times 10^8$ ,  $5 \times 10^8$ ,  $1 \times 10^9$ ,  $1 \times 10^9$  CAR-NK cells on days 3, 7, 10, 14 and 17, respectively. The rest CAR-NK cells were i.p. infused at each time point. Tumor response was assessed by computed tomography (CT) and  $^{18}\text{F}$ -FDG-PET/CT imaging before and after therapy.

Feasibility to manufacture CAR-NK cells was determined by measuring NK cell purity, expansion fold, T cell depletion efficiency, sterility, electroporation efficiency, NK cell viability, and cancer cell killing activity of CAR-NK cells. Safety assessments included incidence of treatment-related adverse events (AEs), according to the National Cancer Institute Common Terminology Criteria of Adverse Events version 4.0. Dose limiting toxicity (DLT) was defined as toxicity following dosing that was at least “possibly related” to CAR-NK cell infusion and met one of the following criteria: 1) any grade 3 or higher toxicity; 2) grade 3 or higher autoimmune toxicity including pericarditis, peritonitis, or



pleuritis; or 3) grade 3 or higher allergic reaction or grade 2 allergic reactions in which symptoms reappear after repeat infusion.

#### ***Allogeneic NK cell preparation***

Allogeneic NK cells were prepared with two hundred mL of blood from haploidentical family donors. After NK cell expansion for 10 days as described above,  $\alpha\beta$  T-cell depletion was performed. Briefly, the cells were incubated with anti-CD3 microbeads (Miltenyi) at 4°C for 15 min. After washing with PBS supplemented with 2% AB serum (Gemini, USA), the cells were re-suspended in 500  $\mu$ L of the corresponding buffer and passed through LS column (Miltenyi). After depletion, NK cells were co-cultured with  $\gamma$ -irradiated K562 feeder cells at 1:1 NK:K562 ratio for another 7 days.

#### ***Ascites fluid analysis***

For patients 1001 and 1002, ascites was collected as part of the standard of care by large volume paracentesis in sterile disposable collection bag containing anti-coagulant heparin. The bags were delivered to the laboratory at 4°C and photos were taken to record the appearance of the ascites. The ascites was transferred to 50 mL centrifuge tubes and centrifuged at 400 g for 6 min. The supernatant was discarded and the red blood cells were removed through ACK lysing buffer (Life Technologies). After washing once with PBS, the total cell number in the ascites was counted by manual counting. The ascites cells were stained with PE anti-EpCAM antibody (R&D) at 4°C for 30 min and washed. The EpCAM positive cells were detected using a BD Fortessa (BD Bioscience) and analyzed through FlowJo.

#### ***Immunohistochemistry and hematoxylin and eosin (H&E) analysis***

Tissue samples of patient 1003 were collected from CAR-NK cell injection sites and tumor tissues away from the treatment sites under ultra-sound guidance. Samples were sent to Department of Pathology, the Third Affiliated Hospital of Guangzhou Medical University for histological examination. Briefly, samples were preserved in 10% neutral buffer formalin and embedded by paraffin. Sections of 5-micron thickness were prepared from all specimens, stained with H&E and anti-MICA/B (R&D), Villin (Genetech, Shanghai), CDX2 (Genetech, Shanghai) antibodies according to manufacturer's instructions, and examined microscopically.

## SUPPLEMENTARY FIGURES

**Supplementary Figure 1. Schematic illustration of the procedure for NK cell expansion from human PBMCs and CAR mRNA electroporation.** The main assays used to evaluate the quality of clinical NK cell samples are listed.

**Supplementary Figure 2. Flow cytometric analysis to detect the surface expression of EGFP and NKG2D on electroporated NK cells.** (A) The electroporation efficiency as demonstrated with EGFP mRNA transfection. The flow cytometric analysis was performed 24 hours after mRNA electroporation. The percentage of positive cells and mean fluorescence intensity (MFI) from two different donors (ID#A and ID#B) are shown. (B) Flow cytometric analysis data from a representative human sample to demonstrate NKG2D MFI increase after electroporation of NKG2D CAR mRNA into NK cells. Electroporated NK cells were stained with an anti-NKG2D antibody 24 hours after mRNA electroporation. Significant increased surface expression of NKG2D on NK cells electroporated with two NKG2D CARs, as compared with controls, indicates CAR expression. (C) Time lapse analysis of NKG2Dp CAR expression on NK cells. *Left:* Histograms to show the surface expression of NKG2D on NK cells derived from one healthy donor and electroporated with mRNA encoding NKG2Dp CAR. MFI values of cells positive for NKG2D staining over an isotype control are indicated. *Right:* Change in MFI values over time. The data represent means  $\pm$  S.D. of three samples from different healthy donors. By day 7, the MFI value went down to levels often observed on non-modified NK cells.

**Supplementary Figure 3. Change in cancer cell killing activity of NKG2D CAR-modified NK cells over time.** Human HCT116 hepatocellular carcinoma cells were used as a target. NK cells were electroporated with NKG2Dp RNA CARs and used at days post-electroporation as indicated for co-culturing with target tumor cells for 2 hours. Mock NK cells served as negative controls. Delfia EuTDA cytotoxicity assay was performed to assess tumor cell lysis efficiency. Although the tumor cell killing activity of CAR-NK cells decreases over time, the differences between CAR-NK cells and mock NK cells at E:T=5:1 are statistically significant at all 4 tested time points ( $p < 0.001$ ).

**Supplementary Figure 4. Quality control of generated CAR-NK cells to ensure that release criteria are met for patient infusion.** Representative results from each patient are shown here. The results are detailed in Table 1. (A) More than 90% of the CAR-NK cells are CD56+CD3-. (B) The increase of NKG2D MFI after NKG2D CAR mRNA electroporation is  $> 1.2$  fold of the original level. (C) Cancer cell killing activities of the CAR-NK cells against HCT116 colorectal cancer cells are  $> 60\%$  at E:T ratio of 10:1.

**Supplementary Figure 5. Effects of electroporation on the survival of NK cells used for patient infusion.** Two, four and six rounds of electroporation were performed for NK cells for patients 1001, 1002, and 1003, respectively. NK cells were harvested and electroporated with NKG2D CAR mRNA. After overnight recovery, the numbers of survived NK cells were counted and % survival rates was calculated.

**Supplementary Figure 6. CAR-NK dose escalation test design.** To establish the recommended dose and schedule of NKG2Dp CAR-NK cells for clinical trials, the listed doses and schedules were tested in 3 patients. Numbers of injected CAR-NK cells and injection times are labelled. Fold changes relative to the first dose in the first patient are indicated in round brackets.

**Supplementary Figure 7. Body temperature changes in patient 1001 after CAR-NK cell infusion.** A low fever of  $38.4^{\circ}\text{C}$  was observed on day 6 post-the 1st CAR-NK cell infusion and was back to normal without treatment.

**Supplementary Figure 8. Body temperature changes in patient1002 after CAR-NK cell infusion.** A fever of 39.5°C was observed on day 2 post-the 2<sup>nd</sup> CAR-NK cell infusion. Pharmacologic treatment with Radix Bupleuri injection and Metamizole Sodium reduced fever. Fever appeared again in the next 3 afternoons and was back to normal after ice pack application or without treatment.

**Supplementary Figure 9. Body temperature changes in patient1003 after CAR-NK cell infusion.** Fever was observed after the 2<sup>nd</sup>, 4<sup>th</sup>, 5<sup>th</sup> and 6<sup>th</sup> CAR-NK cell infusion and reduced with ice pack application or without treatment.

**Supplementary Figure 10. IL-6 and CRP concentrations during CAR-NK treatment.** Patient blood samples were collected for IL-6 (A) and CRP (B) concentration measurement. The IL-6 concentrations of the three patients were first measured before CAR-NK treatment. For P1001 and P1002, it was measured again 2-3 days after CAR-NK treatment, and for P1003, IL-6 concentration was measured on day 1 after 4th infusion and day 1 after 6th infusion. Given repeated high fevers in the third patient, CRP concentrations were measured only in this patient 4 times as indicated after the 3rd infusion.

**Supplementary Figure 11. Characterization of EpCAM-positive cells in patient's ascites.** Ascites samples from patient P1001 and P1002 were collected before CAR-NK treatment at indicated times. Flow cytometric analysis with an anti-EpCAM antibody demonstrates the presence of EpCAM-positive cells in the ascites of the two patients.

**Supplementary Figure 12. Axial CT scanning of three patients with metastatic colorectal cancer treated with CAR-NK cells.** Pre-and post-treatment CT scans are shown.

**Supplementary Figure 13. Ultrasound-guided fine-needle biopsy to obtain tissue samples for histological examination.** (A) in the CAR-NK injected site. (B) in residual tumor tissues left.

**Supplementary Figure 14. Immunohistochemical staining of needle biopsy specimens.** Antibodies against NKG2D ligand MICA/B and two highly sensitive and specific markers of adenocarcinomas of intestinal origin Villin and CDX2 were used.

#### **SUPPLEMENTARY VIDEO**

**Supplementary video to show ultrasound-guided CAR-NK cell infusion.** After injection of 10 mL of saline into the periphery of a big liver tumor (66 x 28 mm in size) to generate a liquid cavity, a needle with a tubing connected to an infusion syringe pump was inserted into the cavity, followed by continuous infusion of 100 mL of CAR-NK cells. Tiny bubbles are visible during infusion.

Supplementary Figure 1

NK cell expansion and electroporation

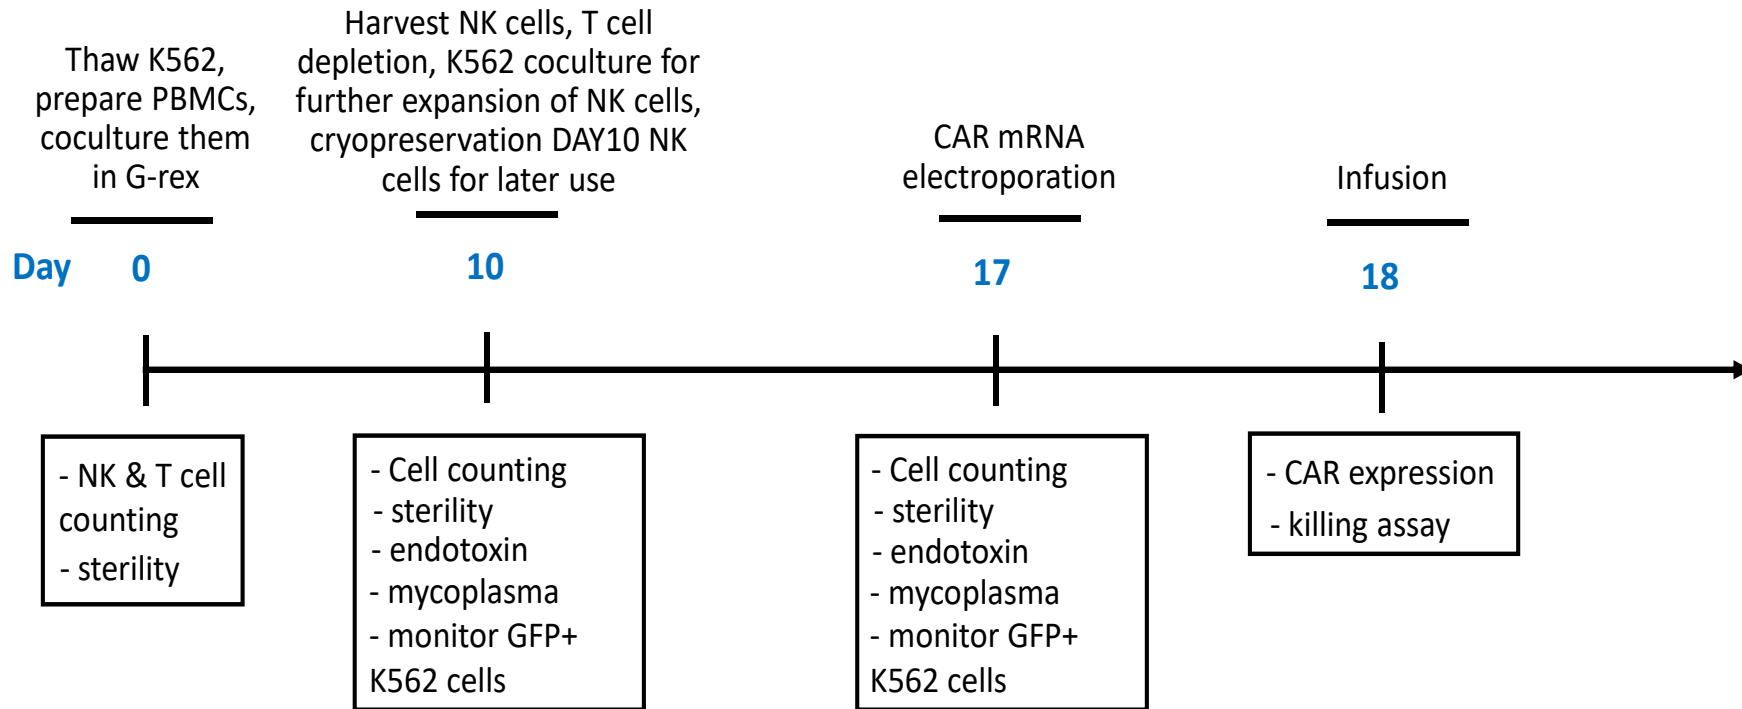

## Supplementary Figure 2

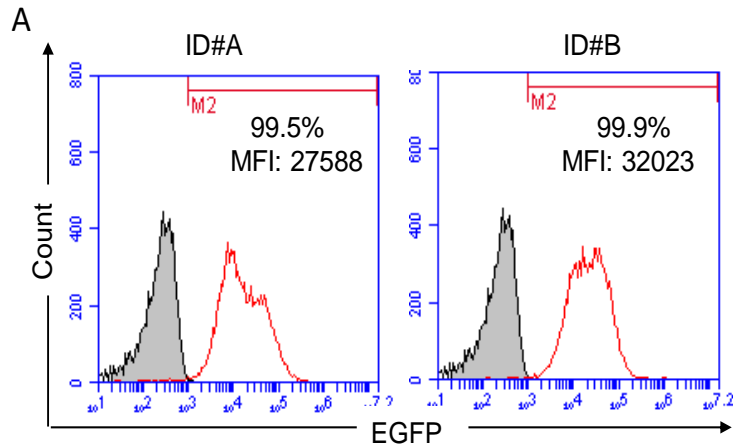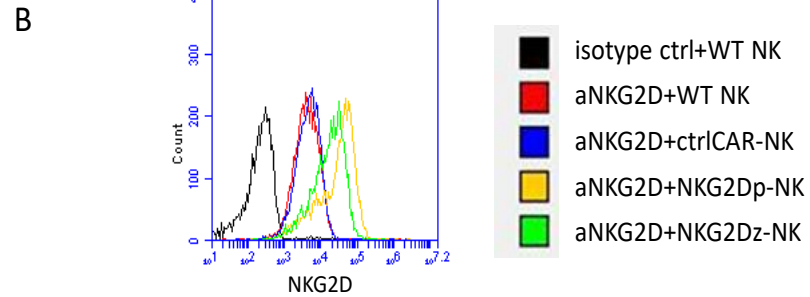

| Plot 5: Multiple Samples<br>Gated on P1 | Count | Volume ( $\mu$ L ) | % of This Plot | % of All | Mean FL4-A | CV FL4-A | Median FL4-A |
|-----------------------------------------|-------|--------------------|----------------|----------|------------|----------|--------------|
| A01 NK ctrl : This Plot                 | 5,268 | 29.5               | 100.00%        | 30.38%   | 385.66     | 730.24%  | 165.0        |
| A02 NK NKG2D : This Plot                | 5,069 | 32.4               | 100.00%        | 27.41%   | 6,538.85   | 563.47%  | 4,027.0      |
| A05 NK GFP NKG2D : This Plot            | 5,000 | 13.6               | 100.00%        | 26.91%   | 7,556.20   | 732.93%  | 4,666.0      |
| A06 NK DAP12 NKG2D : Thi...             | 5,000 | 19.3               | 100.00%        | 28.54%   | 43,060.12  | 129.50%  | 36,441.5     |
| B01 NK CD3Z NKG2D : This ...            | 5,000 | 15.2               | 100.00%        | 34.56%   | 23,552.43  | 94.45%   | 18,611.0     |

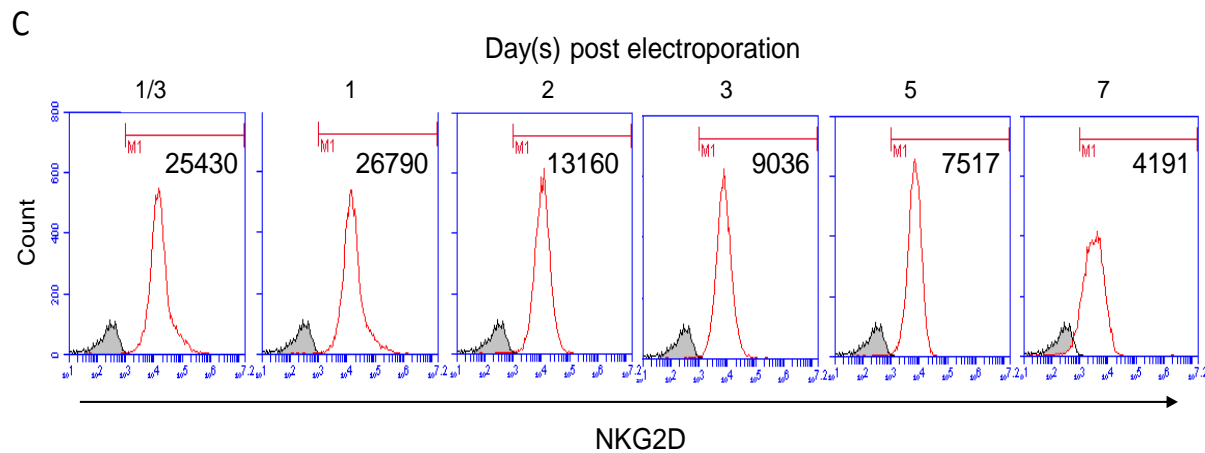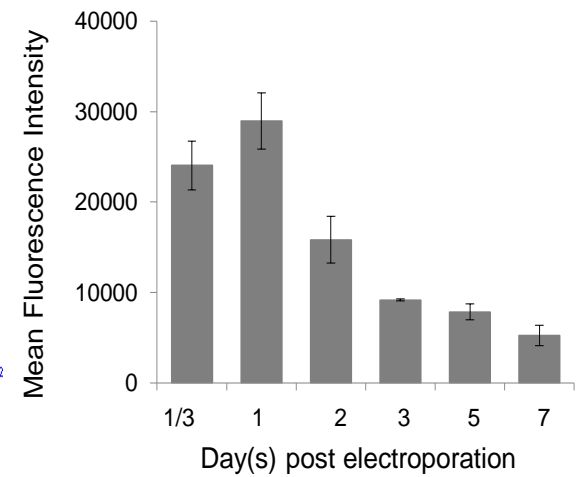

Supplementary Figure 3

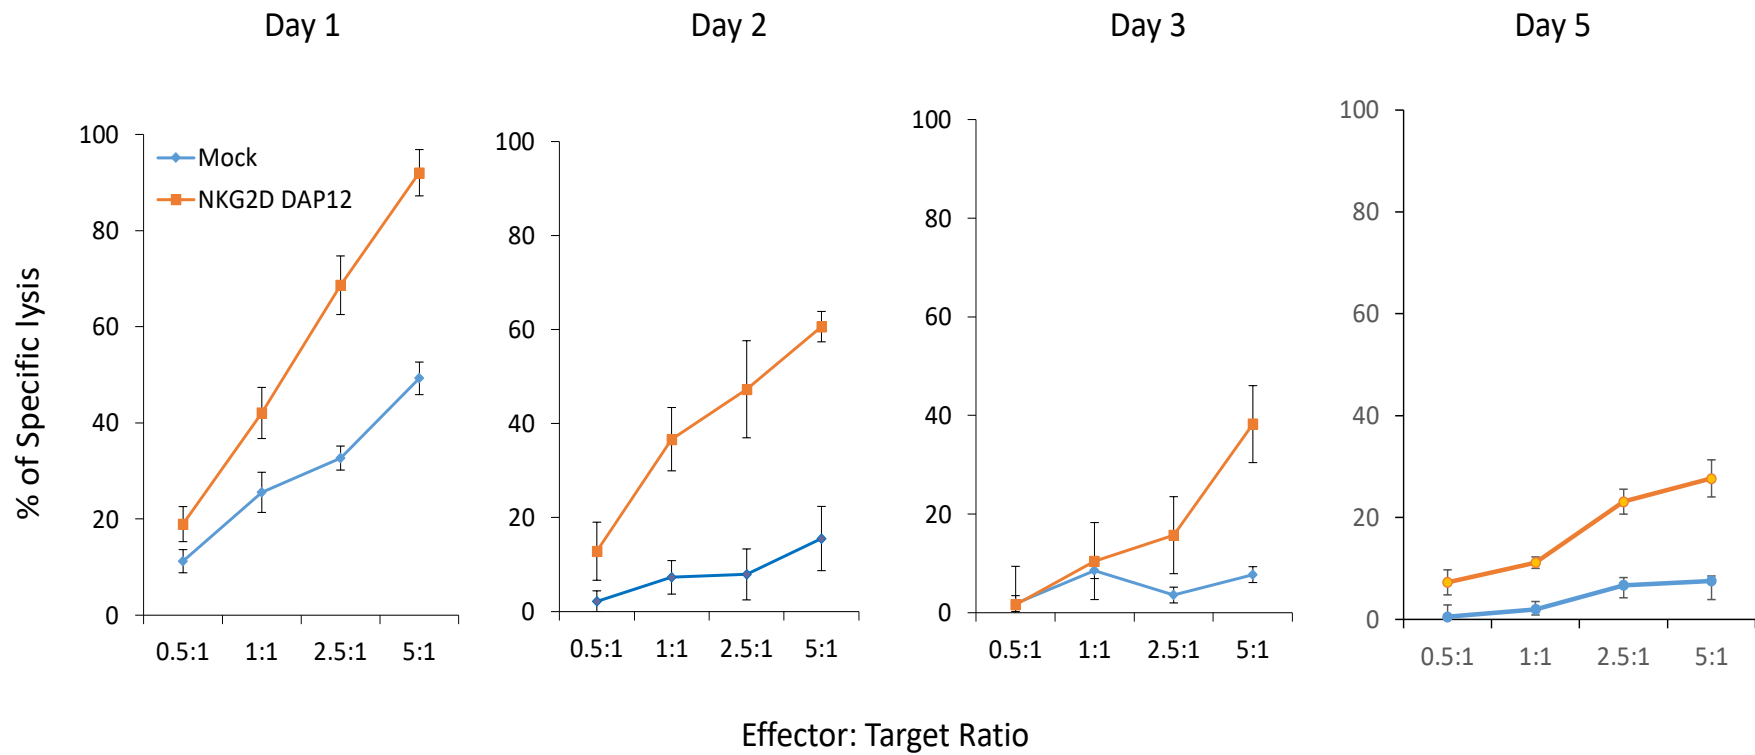

### Supplementary Figure 4

A

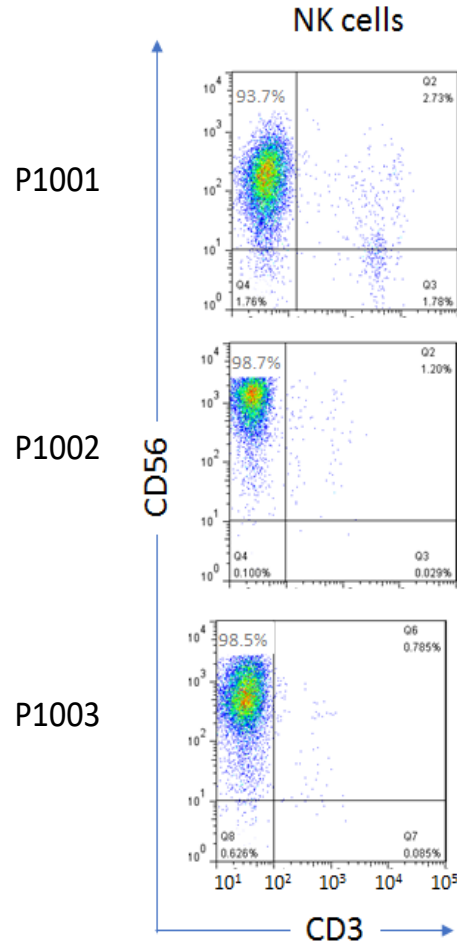

B

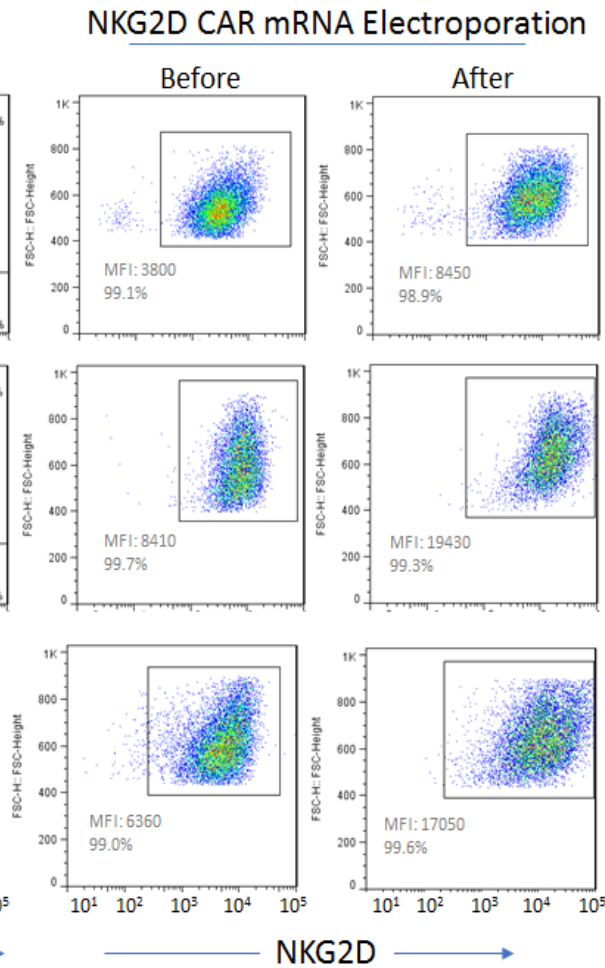

C

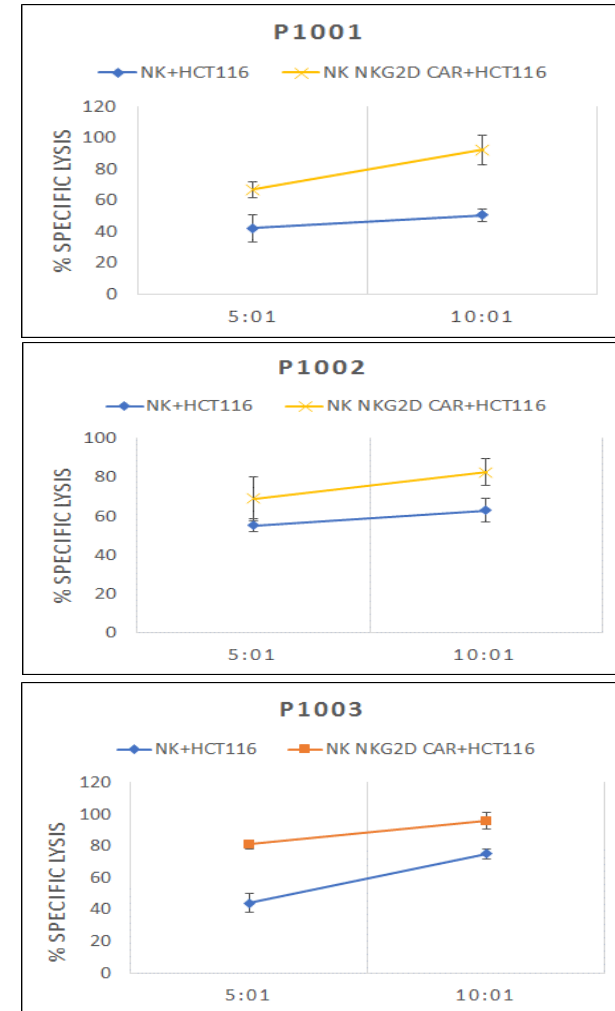

### Supplementary Figure 5

| % NK cells after electroporation (EP) | 1st EP | 2nd EP | 3rd EP | 4th EP | 5th EP | 6th EP | Average | STD   |
|---------------------------------------|--------|--------|--------|--------|--------|--------|---------|-------|
| <b>Patient1001</b>                    | 50.0   | 84.0   |        |        |        |        | 67.0    | 24.04 |
| <b>Patient1002</b>                    | 69.5   | 68.8   | 101.0  | 60.0   |        |        | 74.8    | 17.95 |
| <b>Patient1003</b>                    | 57.5   | 68.8   | 59.8   | 53.0   | 42.0   | 72.6   | 59.0    | 11.03 |

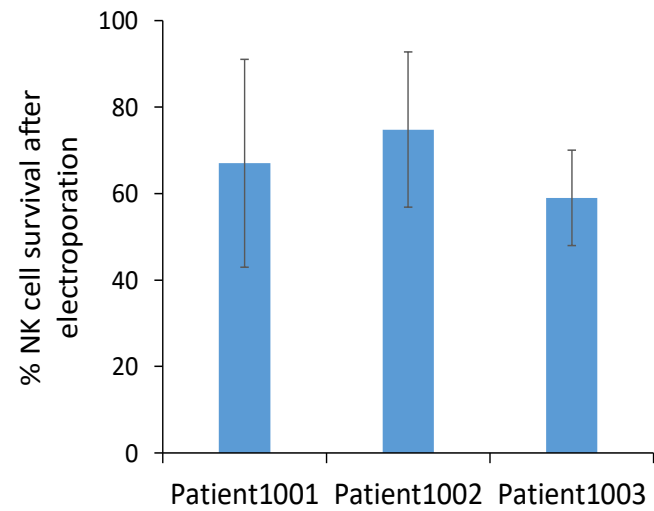



Supplementary Figure 6

### CAR-NK Dose Escalation in 3 Patients

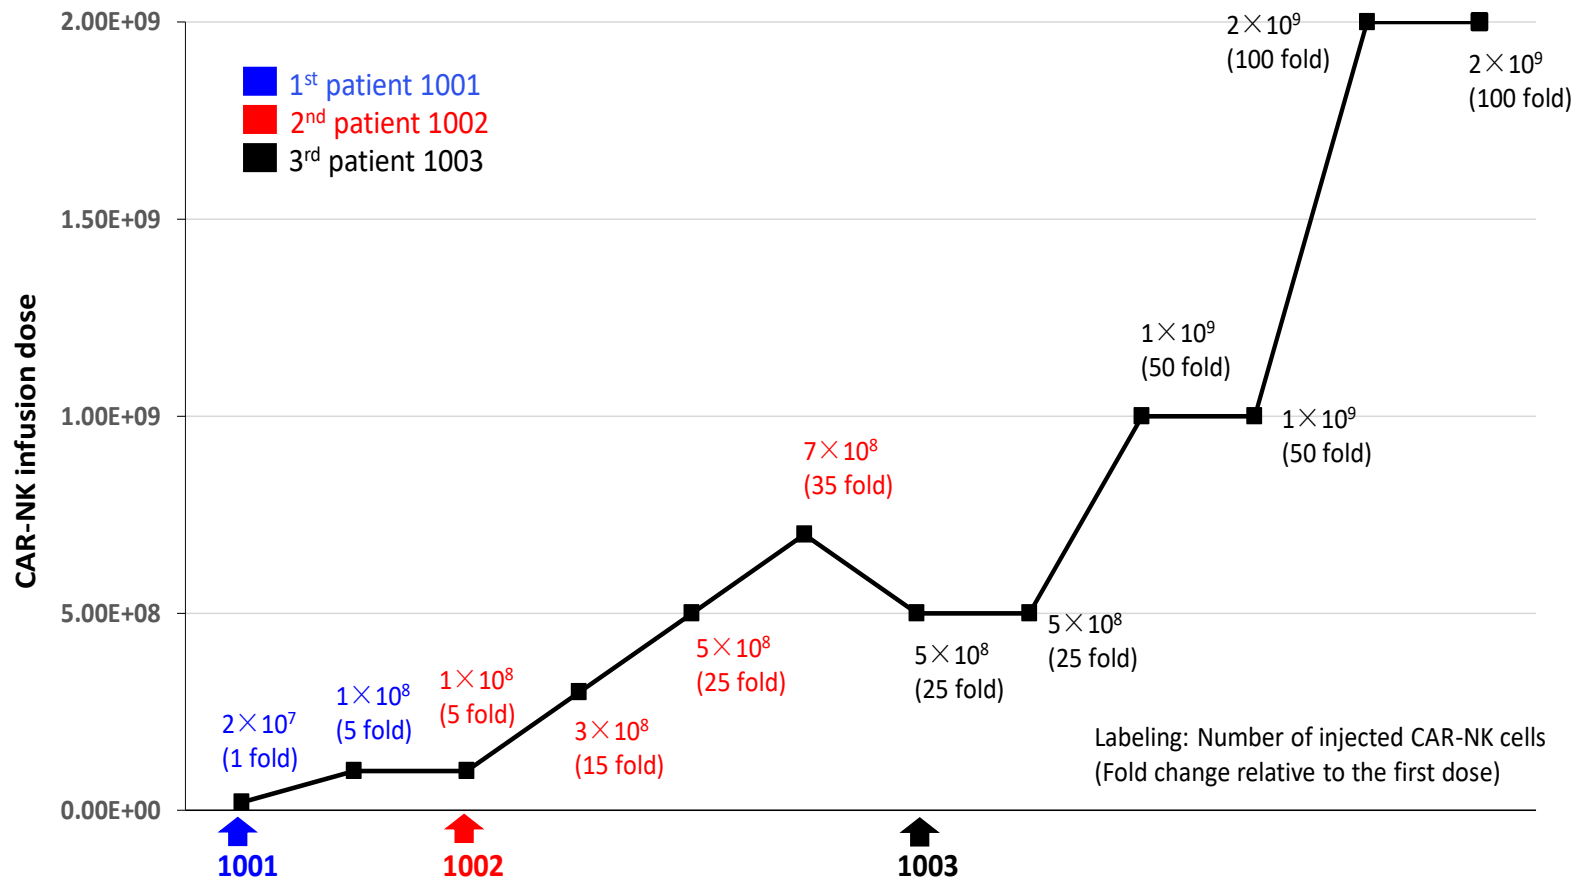

### Supplementary Figure 7

#### Body temperature after CAR-NK infusion in patient 1001

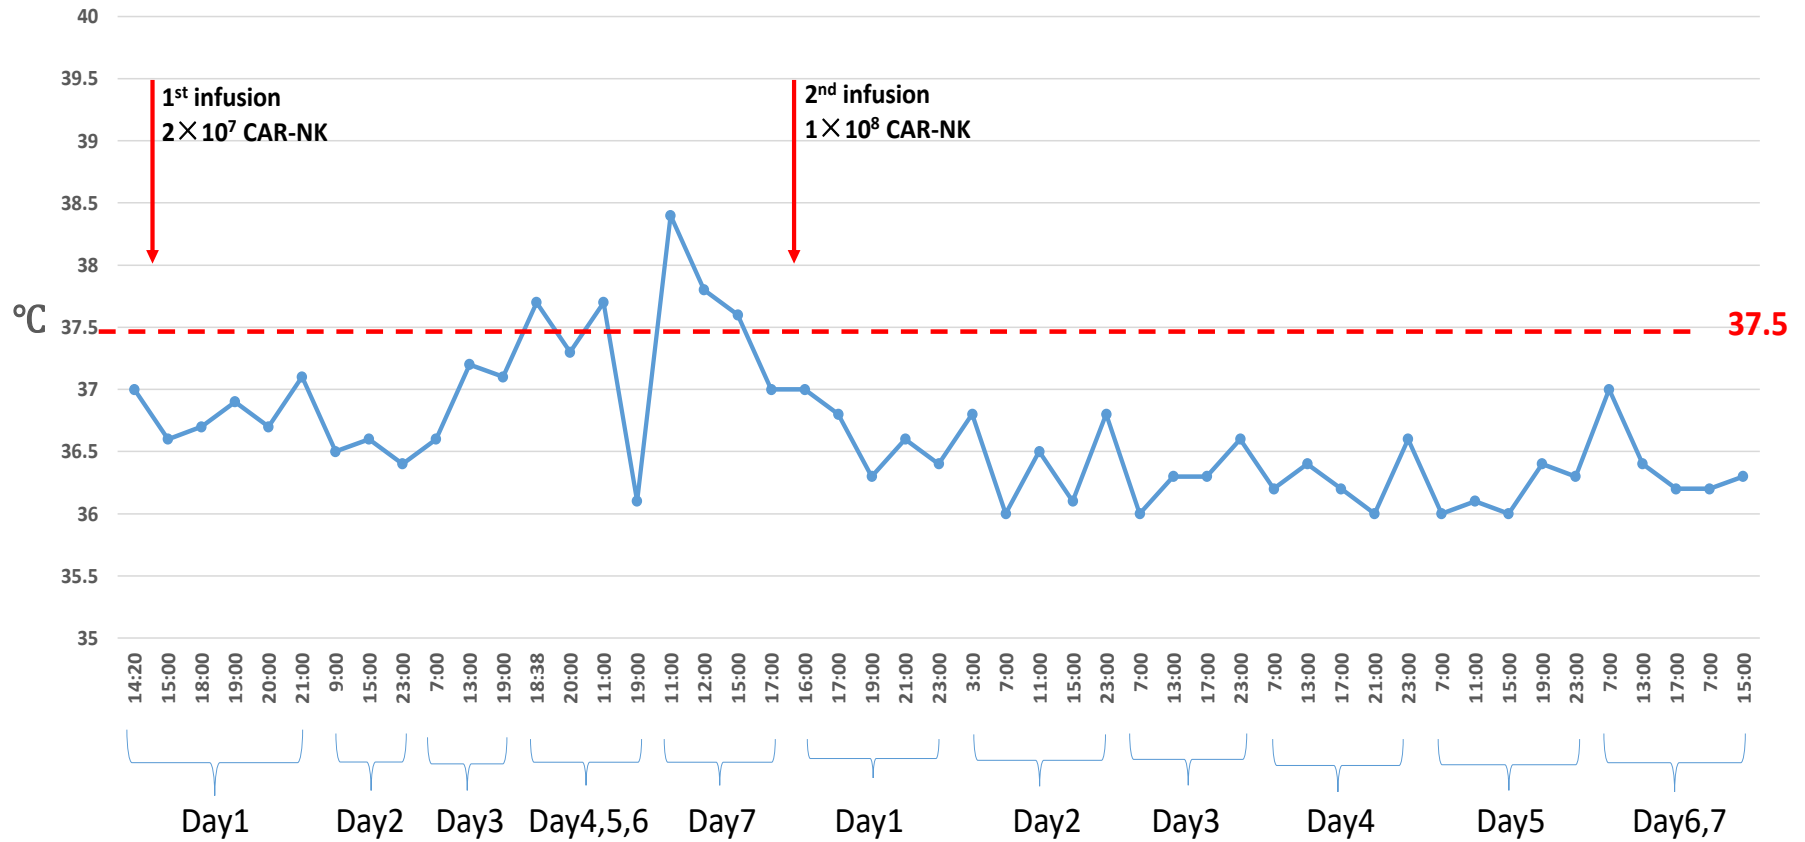

Supplementary Figure 8

Body temperature after CAR-NK infusion in patient 1002

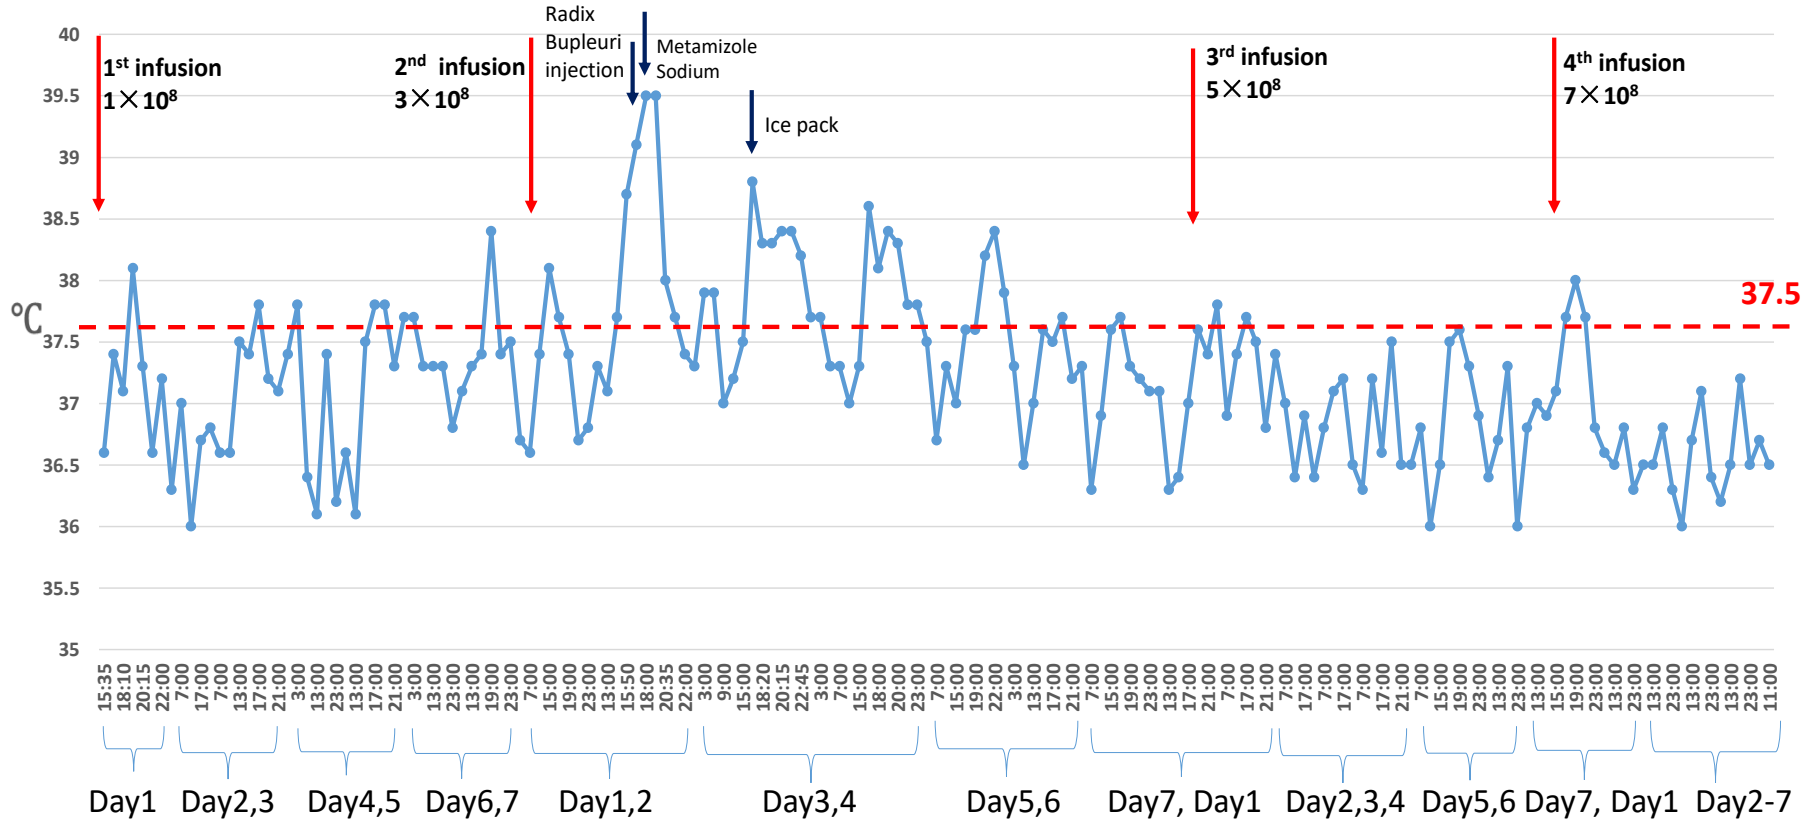

Supplementary Figure 9

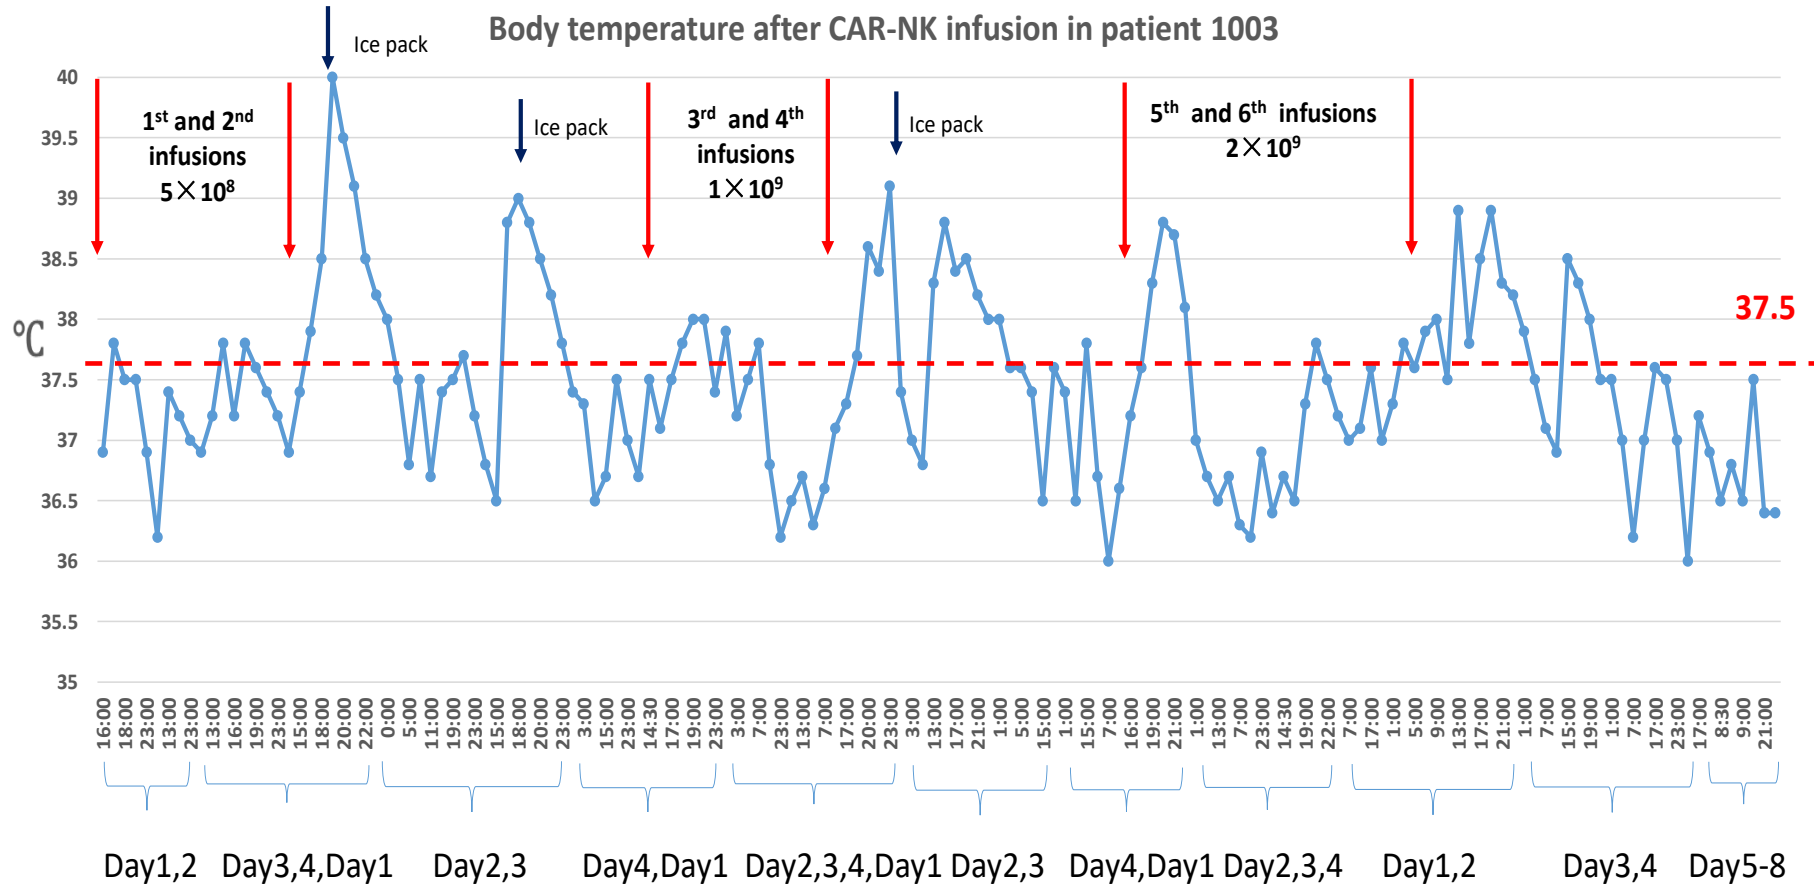

### Supplementary Figure 10

A

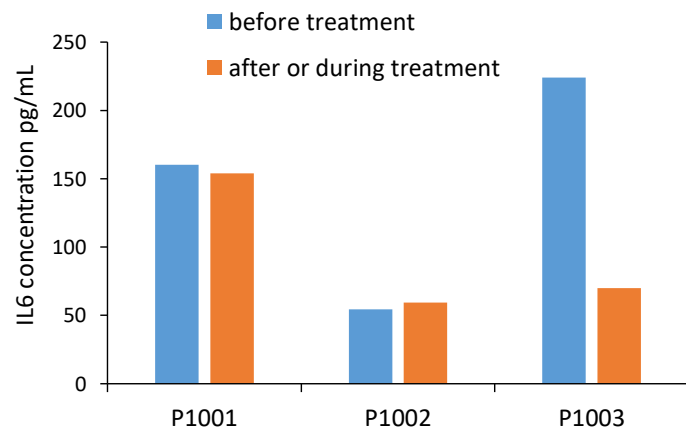

B

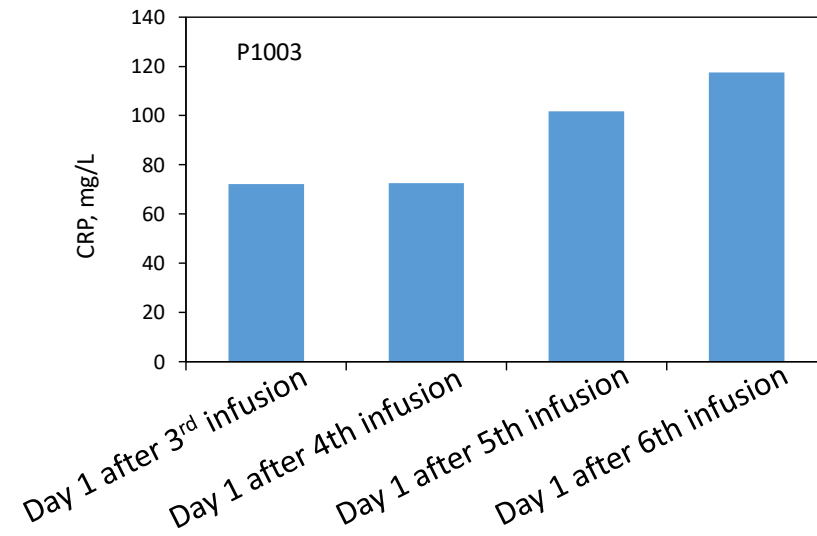

# Supplementary Figure 11

## P1001 before infusion (Day 0)

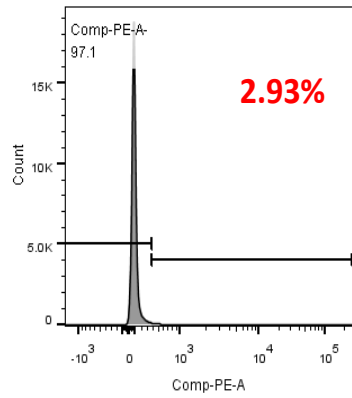

Isotype control

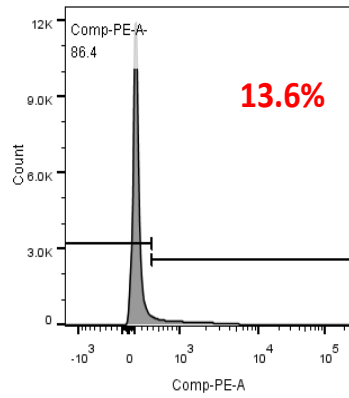

anti-EpCAM

## P1002 before infusion (Day -1)

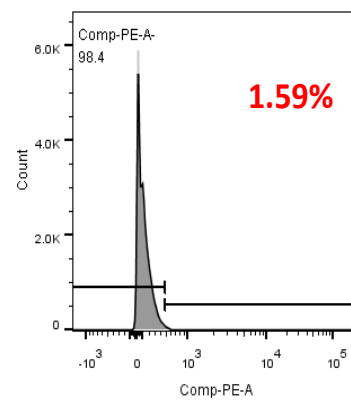

Isotype control

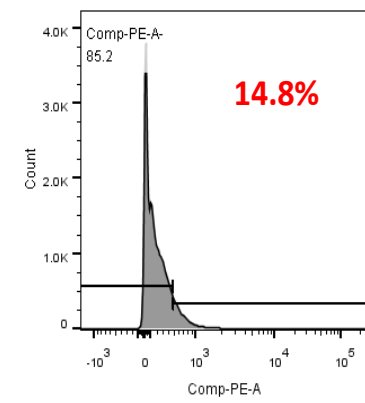

EpCAM

# Supplementary Figure 12

Patient 1001

Before therapy      2 weeks after therapy

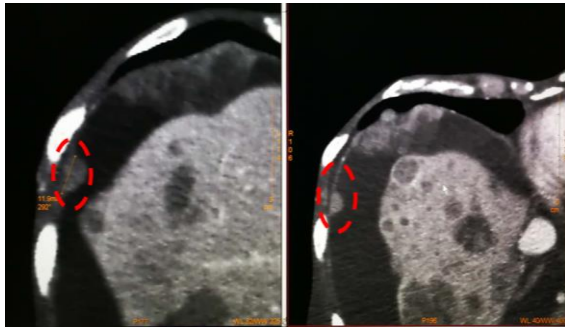

Patient 1002

Before therapy

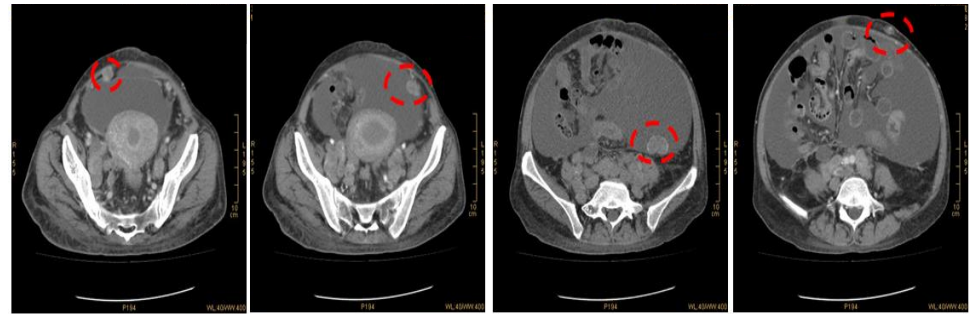

4 weeks after therapy

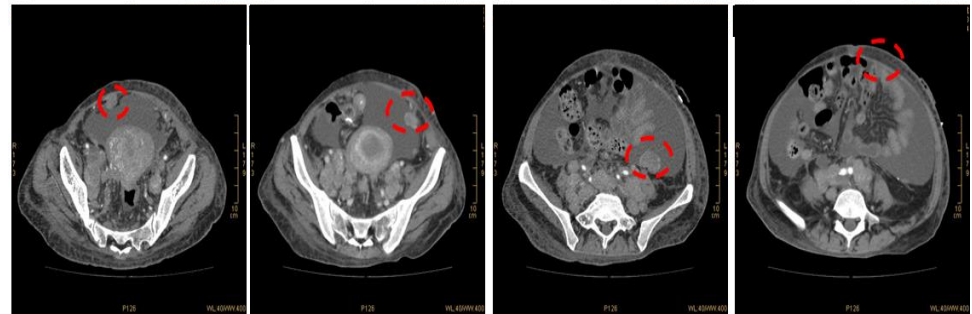

Patient 1003

Before therapy      4 weeks after therapy

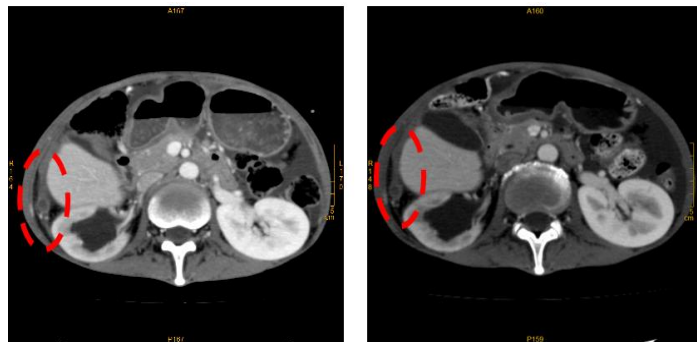

# Supplementary Figure 13

A

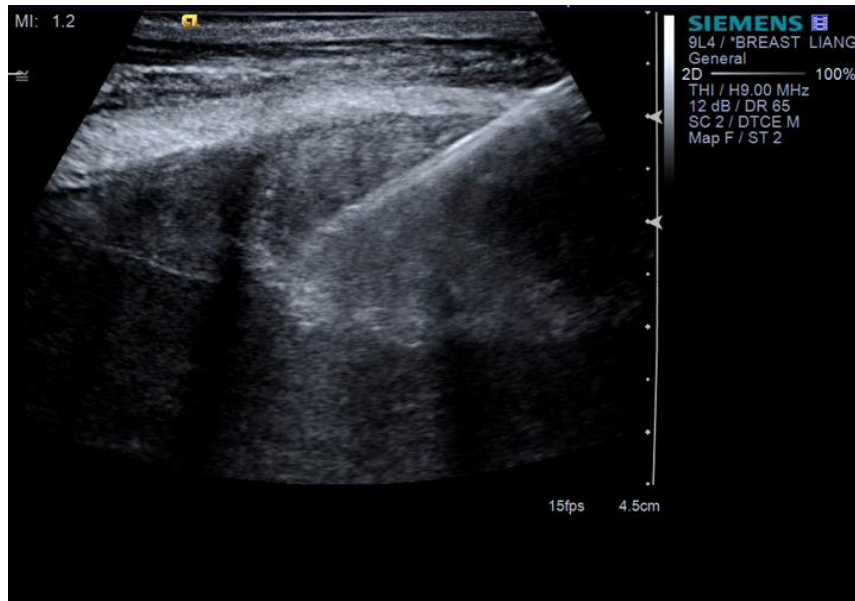

B

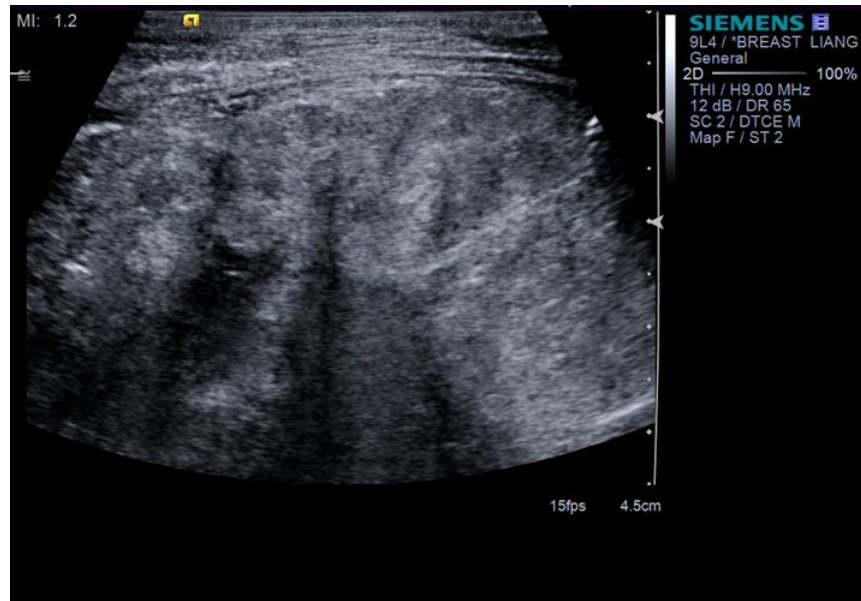



**Supplementary Figure 14**

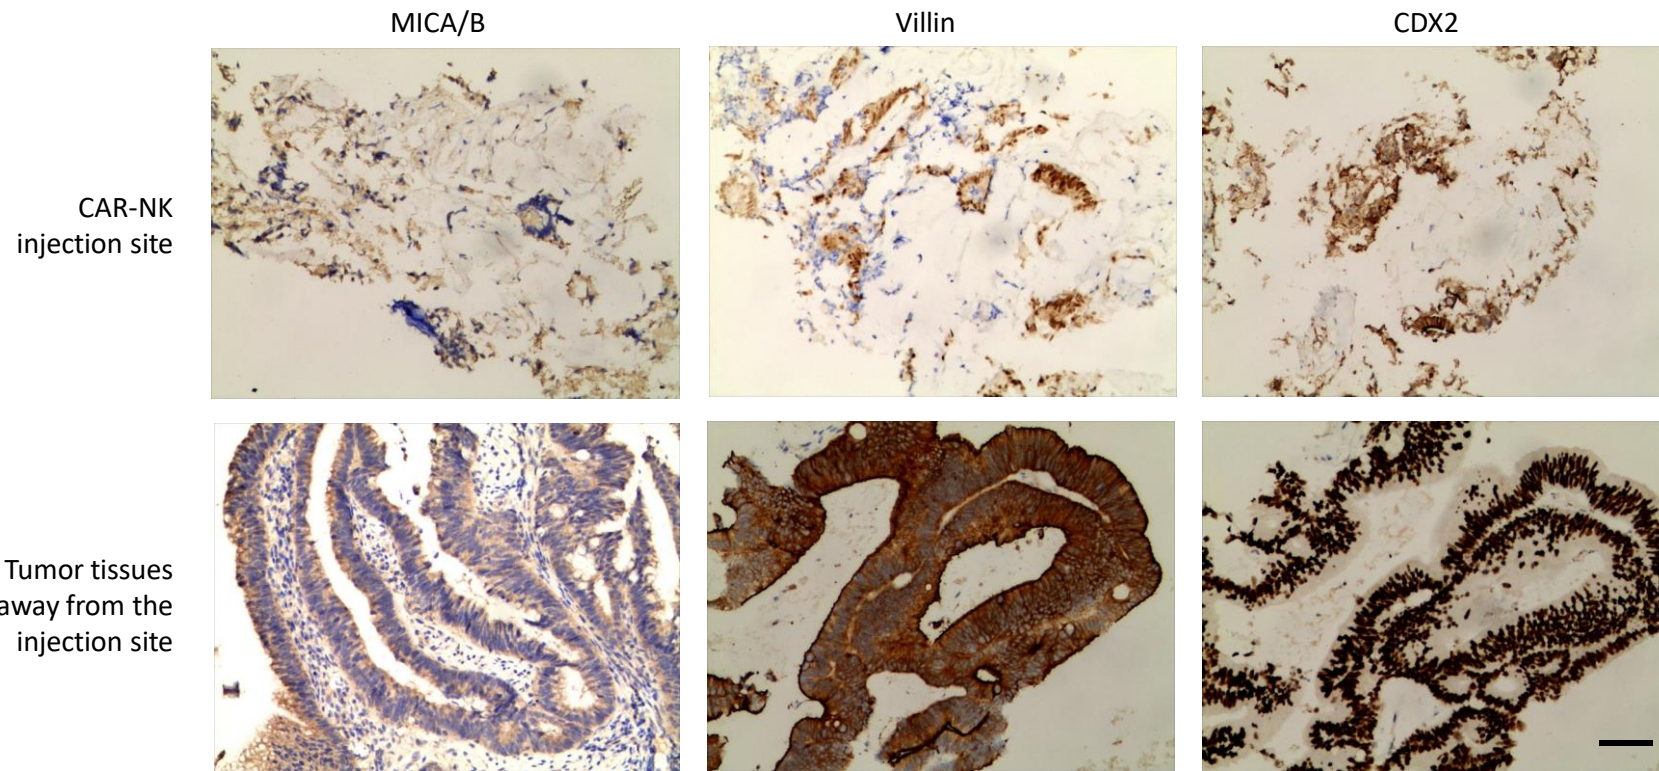

Supplement: mmc3.pdf [file mmc3.pdf]
